# Supplementary material for: Catalytic performance of a series of guanidinium-based ionic liquids in the coupling reaction of carbon dioxide with epoxides
Source: Royal Society of Chemistry journal article supplement (doi:10.1039/c6ra20174a), 2016-01-01
Supplement: c6ra20174a1.pdf [file c6ra20174a1.pdf]

## Supporting Information

### Catalytic performance of a series of guanidinium-based ionic liquids on the coupling reaction of carbon dioxide with epoxides

Ping Li, Ya Li, Ci Chen, Li Wang\* and Jinglai Zhang\*

*Institute of Environmental and Analytical Sciences, College of Chemistry and Chemical*

*Engineering, Henan University, Kaifeng, Henan 475004, P.R. China*

Table S1 Cartesian coordinates of optimized reactants, intermediates, transition states, and product discussed in the text for Route 1-10.

| <b>CO<sub>2</sub></b> |          |          |           |
|-----------------------|----------|----------|-----------|
| C                     | 0.000000 | 0.000000 | 0.000000  |
| O                     | 0.000000 | 0.000000 | 1.169169  |
| O                     | 0.000000 | 0.000000 | -1.169169 |

  

| <b>EO</b> |           |           |           |
|-----------|-----------|-----------|-----------|
| C         | -0.152080 | -0.037763 | 0.489352  |
| C         | 1.044401  | 0.615467  | -0.060917 |
| O         | 0.827113  | -0.789877 | -0.242248 |
| H         | -0.156286 | -0.252558 | 1.560617  |
| H         | 1.873002  | 0.882271  | 0.595407  |
| C         | 0.955489  | 1.222369  | -0.962611 |
| H         | -1.510618 | 0.100225  | -0.148909 |
| H         | -2.079692 | -0.830093 | -0.050486 |
| H         | -1.414316 | 0.329737  | -1.213793 |

  

| <b>cp1-1</b> |           |          |           |
|--------------|-----------|----------|-----------|
| C            | -2.673577 | 0.939990 | 0.027833  |
| N            | -2.736948 | 2.234741 | -0.415116 |
| N            | -3.787281 | 0.388422 | 0.578497  |
| C            | -3.539805 | 3.248350 | 0.258544  |
| H            | -2.920463 | 4.132088 | 0.451596  |
| H            | -4.400184 | 3.561955 | -0.346404 |
| H            | -3.900116 | 2.860854 | 1.211158  |
| C            | -2.022322 | 2.674524 | -1.610327 |
| H            | -2.721632 | 3.193291 | -2.276666 |
| H            | -1.202733 | 3.361564 | -1.369492 |
| H            | -1.619330 | 1.813506 | -2.141490 |

\*Corresponding author. E-mail: [chemwangl@henu.edu.cn](mailto:chemwangl@henu.edu.cn); [zhangjinglai@henu.edu.cn](mailto:zhangjinglai@henu.edu.cn)

|    |           |           |           |
|----|-----------|-----------|-----------|
| C  | -5.107698 | 0.584034  | -0.019555 |
| H  | -5.475706 | -0.372084 | -0.408344 |
| H  | -5.822694 | 0.957745  | 0.721758  |
| H  | -5.049484 | 1.290060  | -0.846884 |
| C  | -3.683967 | -0.750608 | 1.503450  |
| H  | -4.578724 | -0.751320 | 2.132511  |
| H  | -3.578111 | -1.702296 | 0.970017  |
| H  | -2.803433 | -0.623676 | 2.134683  |
| N  | -1.562703 | 0.228060  | -0.042015 |
| H  | -1.645137 | -0.845028 | -0.160503 |
| C  | -0.193479 | 0.739628  | -0.092938 |
| H  | 0.188750  | 0.729522  | -1.118079 |
| H  | -0.176126 | 1.777051  | 0.252628  |
| C  | 0.709767  | -0.144486 | 0.771605  |
| H  | 0.453469  | -0.069776 | 1.833378  |
| H  | 0.553863  | -1.197883 | 0.494009  |
| Br | -1.580292 | -2.822705 | -0.500002 |
| C  | 5.795923  | 0.198706  | -0.536080 |
| C  | 5.710744  | 1.471145  | 0.190317  |
| O  | 5.522447  | 0.217166  | 0.890690  |
| H  | 4.920773  | -0.071367 | -1.125890 |
| H  | 4.808597  | 2.068700  | 0.089629  |
| H  | 6.623435  | 1.996376  | 0.466034  |
| C  | 7.103958  | -0.424936 | -0.939948 |
| H  | 7.043058  | -1.516619 | -0.890423 |
| H  | 7.352256  | -0.147950 | -1.970199 |
| H  | 7.913240  | -0.094332 | -0.283222 |
| C  | 2.168608  | 0.204868  | 0.588153  |
| N  | 2.586415  | 0.933586  | -0.302308 |
| N  | 2.947330  | -0.377367 | 1.497186  |
| H  | 3.896718  | -0.148650 | 1.299841  |

---



---

**cp1-2**

---

|    |           |           |           |
|----|-----------|-----------|-----------|
| Br | -1.370566 | -0.031000 | 1.759821  |
| C  | -3.204750 | -0.381796 | 1.039993  |
| C  | -3.348345 | 0.066748  | -0.413119 |
| N  | -2.418717 | -0.599955 | -1.247138 |
| H  | -3.870404 | 0.155478  | 1.715319  |
| H  | -3.188053 | 1.149798  | -0.470831 |
| H  | -1.734519 | 0.067908  | -1.503533 |
| C  | 2.579430  | 0.092635  | -0.168289 |
| N  | 3.330370  | 0.046116  | 0.978639  |
| N  | 2.926033  | -0.728000 | -1.201883 |
| C  | 4.778438  | -0.120625 | 0.959514  |

|   |           |           |           |
|---|-----------|-----------|-----------|
| H | 5.250196  | 0.695397  | 1.520204  |
| H | 5.088498  | -1.069375 | 1.415919  |
| H | 5.140085  | -0.088541 | -0.068018 |
| C | 2.708674  | 0.204610  | 2.290473  |
| H | 3.136700  | -0.536229 | 2.974880  |
| H | 2.872705  | 1.201475  | 2.717414  |
| H | 1.637322  | 0.017094  | 2.216878  |
| C | 3.349430  | -2.109856 | -0.968935 |
| H | 2.566954  | -2.794851 | -1.311859 |
| H | 4.275951  | -2.326293 | -1.511652 |
| H | 3.510978  | -2.282574 | 0.093726  |
| C | 2.399513  | -0.470522 | -2.544289 |
| H | 3.100147  | -0.886853 | -3.273688 |
| H | 1.415792  | -0.930187 | -2.686260 |
| H | 2.306505  | 0.602690  | -2.708451 |
| N | 1.563298  | 0.911841  | -0.304088 |
| H | 0.720143  | 0.792800  | -1.020255 |
| C | 1.338705  | 2.186642  | 0.385188  |
| H | 0.750689  | 2.026205  | 1.295635  |
| H | 2.296646  | 2.636345  | 0.668499  |
| C | 0.542089  | 3.103408  | -0.564215 |
| H | 0.231633  | 4.003060  | -0.029807 |
| H | 1.184610  | 3.405924  | -1.400801 |
| C | -0.719994 | 2.409497  | -1.140815 |
| N | -0.486389 | 1.228967  | -1.648498 |
| N | -1.805823 | 2.978261  | -1.094092 |
| C | -4.770287 | -0.263631 | -0.886397 |
| H | -4.936860 | -1.346108 | -0.872608 |
| H | -5.532569 | 0.218837  | -0.264986 |
| H | -4.890863 | 0.085533  | -1.914979 |
| H | -3.321302 | -1.458682 | 1.151608  |
| C | -0.978439 | -2.735123 | -0.488752 |
| N | -0.004264 | -2.320141 | -0.990589 |
| N | -1.888040 | -3.256565 | 0.025704  |

---



---

**cp1-3**

|    |           |           |           |
|----|-----------|-----------|-----------|
| Br | -5.30766  | 0.483234  | 0.13407   |
| C  | -3.411216 | 0.063085  | 0.557591  |
| C  | -2.849153 | -0.913638 | -0.477392 |
| O  | -1.400863 | -0.898149 | -0.429266 |
| H  | -3.407385 | -0.345251 | 1.563139  |
| H  | -3.067723 | -0.501706 | -1.468952 |
| H  | -0.63503  | 0.228802  | -1.259783 |

|   |           |           |           |
|---|-----------|-----------|-----------|
| C | 3.595661  | -0.101227 | 0.054666  |
| N | 4.788638  | 0.375994  | 0.526926  |
| N | 3.579235  | -1.284269 | -0.602107 |
| C | 6.045617  | 0.172335  | -0.18491  |
| H | 6.562415  | 1.133473  | -0.288082 |
| H | 6.71294   | -0.517533 | 0.346515  |
| H | 5.847043  | -0.223924 | -1.18038  |
| C | 4.88571   | 1.069394  | 1.809161  |
| H | 5.639877  | 0.574131  | 2.432167  |
| H | 5.181356  | 2.117861  | 1.6844    |
| H | 3.928741  | 1.026267  | 2.327927  |
| C | 4.387717  | -2.420341 | -0.158861 |
| H | 3.720429  | -3.236414 | 0.138008  |
| H | 5.04027   | -2.776962 | -0.96324  |
| H | 4.995552  | -2.144922 | 0.701628  |
| C | 2.506652  | -1.624105 | -1.548943 |
| H | 2.943964  | -2.233339 | -2.345767 |
| H | 1.701188  | -2.162492 | -1.043367 |
| H | 2.082221  | -0.713721 | -1.970586 |
| N | 2.463333  | 0.572585  | 0.220042  |
| H | 1.57964   | -0.020179 | 0.301569  |
| C | 2.335685  | 2.028674  | 0.301389  |
| H | 1.859203  | 2.293592  | 1.251196  |
| H | 3.327495  | 2.483194  | 0.275538  |
| C | 1.483626  | 2.597006  | -0.855559 |
| H | 1.371103  | 3.673197  | -0.699984 |
| H | 1.977583  | 2.414317  | -1.813388 |
| C | 0.112708  | 1.940007  | -0.823348 |
| O | 0.057737  | 0.872968  | -1.621457 |
| O | -0.769572 | 2.303313  | -0.069353 |
| C | -3.407791 | -2.329967 | -0.39109  |
| H | -3.166958 | -2.771308 | 0.576474  |
| H | -4.493349 | -2.304212 | -0.519663 |
| H | -2.976692 | -2.948538 | -1.183977 |
| H | -2.882292 | 1.013765  | 0.512787  |
| C | -0.711147 | -1.261673 | 0.805577  |
| O | 0.535356  | -1.127802 | 0.671201  |
| O | -1.389701 | -1.642671 | 1.747583  |

---



---

**cp1-4**

---

---

|    |           |           |           |
|----|-----------|-----------|-----------|
| C  | 2.720866  | -0.558704 | -0.106803 |
| N  | 3.993708  | -0.079004 | -0.225027 |
| N  | 2.436041  | -1.796783 | -0.577136 |
| C  | 4.839246  | -0.389039 | -1.373554 |
| H  | 5.229717  | 0.543548  | -1.796218 |
| H  | 5.691107  | -1.021544 | -1.095368 |
| H  | 4.253289  | -0.897251 | -2.138767 |
| C  | 4.573180  | 0.817130  | 0.773426  |
| H  | 5.564905  | 0.445076  | 1.054388  |
| H  | 4.682748  | 1.838906  | 0.392739  |
| H  | 3.945254  | 0.835365  | 1.663253  |
| C  | 3.358907  | -2.916772 | -0.396855 |
| H  | 2.871983  | -3.690973 | 0.206089  |
| H  | 3.643569  | -3.354955 | -1.359874 |
| H  | 4.256562  | -2.588728 | 0.126159  |
| C  | 1.068200  | -2.158792 | -0.990729 |
| H  | 1.148125  | -2.987930 | -1.698600 |
| H  | 0.442160  | -2.442035 | -0.137788 |
| H  | 0.592696  | -1.314406 | -1.492029 |
| N  | 1.764332  | 0.170376  | 0.453393  |
| H  | 0.939838  | -0.328663 | 0.878022  |
| C  | 1.625927  | 1.633174  | 0.396519  |
| H  | 1.830011  | 2.078944  | 1.374936  |
| H  | 2.348780  | 2.042487  | -0.312350 |
| C  | 0.193836  | 1.940580  | -0.031690 |
| H  | 0.000845  | 1.544162  | -1.034850 |
| H  | -0.492261 | 1.400675  | 0.634259  |
| Br | -0.876532 | -1.029966 | 1.814817  |
| C  | -3.785365 | -1.142241 | -0.124432 |
| C  | -3.725179 | 0.347964  | 0.278991  |
| O  | -2.910470 | -1.204597 | -1.283023 |
| H  | -3.302813 | -1.748589 | 0.645854  |
| H  | -3.305809 | 0.469793  | 1.278830  |
| H  | -4.683850 | 0.864458  | 0.176354  |
| C  | -5.162274 | -1.656165 | -0.497745 |
| H  | -5.106531 | -2.690040 | -0.848155 |
| H  | -5.816919 | -1.630009 | 0.379706  |
| H  | -5.612121 | -1.043637 | -1.285684 |
| C  | -2.294590 | -0.034588 | -1.481413 |
| N  | -2.800923 | 0.932089  | -0.666641 |
| N  | -1.426242 | -0.377367 | 1.497186  |
| H  | 3.896718  | -0.148650 | 1.299841  |

---

**cp2-1**

---

---

|    |           |           |           |
|----|-----------|-----------|-----------|
| Br | -0.306807 | -1.828963 | -0.090952 |
| C  | -3.717162 | -0.566109 | -0.753526 |
| C  | -3.532722 | -0.324499 | 0.679962  |
| O  | -3.487501 | 0.780989  | -0.265118 |
| H  | -2.883098 | -1.003245 | -1.298926 |
| H  | -2.551529 | -0.601806 | 1.066193  |
| H  | -2.118792 | 1.58769   | -1.076178 |
| C  | 1.978422  | 0.486634  | -0.014918 |
| N  | 2.448288  | 0.711566  | 1.245794  |
| N  | 2.673058  | -0.291966 | -0.876282 |
| C  | 3.867268  | 0.839011  | 1.544721  |
| H  | 4.02115   | 1.708547  | 2.194005  |
| H  | 4.267073  | -0.042862 | 2.062392  |
| H  | 4.426766  | 0.989697  | 0.620795  |
| C  | 1.531753  | 0.537186  | 2.379579  |
| H  | 2.035436  | -0.071533 | 3.137968  |
| H  | 1.243379  | 1.490828  | 2.836826  |
| H  | 0.654215  | -0.018922 | 2.037887  |
| C  | 3.228405  | -1.571559 | -0.403342 |
| H  | 2.429358  | -2.323183 | -0.437276 |
| H  | 4.065934  | -1.853218 | -1.046251 |
| H  | 3.583274  | -1.490232 | 0.621122  |
| C  | 2.265701  | -0.335849 | -2.28607  |
| H  | 3.108034  | -0.70833  | -2.874078 |
| H  | 1.405571  | -1.006989 | -2.400905 |
| H  | 2.000111  | 0.66473   | -2.628787 |
| N  | 0.864119  | 1.08915   | -0.433314 |
| H  | 0.234417  | 0.495561  | -0.984522 |
| C  | 0.174246  | 2.204106  | 0.199654  |
| H  | -0.483421 | 1.83826   | 0.998538  |
| H  | 0.903688  | 2.889459  | 0.641742  |
| C  | -0.673027 | 2.906257  | -0.874001 |
| H  | -1.306903 | 3.659853  | -0.380869 |
| H  | -0.012095 | 3.433485  | -1.571614 |
| H  | -4.716819 | -0.726925 | -1.155096 |
| C  | -4.680845 | -0.292692 | 1.652109  |
| H  | -4.807145 | -1.276581 | 2.11694   |
| H  | -4.49832  | 0.433911  | 2.451298  |
| H  | -5.612955 | -0.020988 | 1.148218  |
| O  | -1.412444 | 1.982803  | -1.634194 |

---

| <b>cp2-2</b> |           |           |           |
|--------------|-----------|-----------|-----------|
| C            | -2.604519 | 0.352262  | 0.239735  |
| N            | -2.366339 | 1.532945  | -0.458815 |
| N            | -3.777094 | -0.314682 | -0.129317 |
| C            | -3.42906  | 2.460479  | -0.805979 |
| H            | -3.210524 | 3.459181  | -0.4029   |
| H            | -3.551095 | 2.562786  | -1.894884 |
| H            | -4.370943 | 2.112148  | -0.382455 |
| C            | -1.02428  | 1.903796  | -0.875913 |
| H            | -1.053413 | 2.249372  | -1.917933 |
| H            | -0.591905 | 2.710614  | -0.26859  |
| H            | -0.357171 | 1.044164  | -0.824934 |
| C            | -4.001567 | -0.596699 | -1.546591 |
| H            | -3.506226 | -1.530769 | -1.852611 |
| H            | -5.074922 | -0.694848 | -1.740267 |
| H            | -3.610877 | 0.211804  | -2.162994 |
| C            | -4.237242 | -1.383639 | 0.746067  |
| H            | -5.288468 | -1.593025 | 0.521217  |
| H            | -3.660099 | -2.310845 | 0.615368  |
| H            | -4.142687 | -1.072569 | 1.786074  |
| N            | -1.874787 | -0.139328 | 1.183044  |
| H            | -0.859432 | -1.71484  | 1.927963  |
| C            | -0.873387 | 0.64428   | 1.892595  |
| H            | -0.009804 | 0.906623  | 1.270572  |
| H            | -1.285892 | 1.582605  | 2.294137  |
| C            | -0.373352 | -0.254978 | 3.029263  |
| H            | 0.541887  | 0.137523  | 3.481781  |
| H            | -1.137543 | -0.347947 | 3.813928  |
| O            | -0.075742 | -1.551612 | 2.495817  |
| Br           | 2.641372  | 1.855576  | -0.198469 |
| C            | 3.425891  | 0.052077  | -0.449499 |
| C            | 2.867164  | -0.947134 | 0.55267   |
| O            | 1.493871  | -1.13611  | 0.262541  |
| H            | 4.501046  | 0.18883   | -0.341608 |
| H            | 2.991373  | -0.529351 | 1.562344  |
| H            | 1.013191  | -1.360851 | 1.090474  |
| C            | 3.63701   | -2.272681 | 0.460875  |
| H            | 3.549251  | -2.696422 | -0.54419  |
| H            | 4.698423  | -2.143785 | 0.699218  |

|              |           |           |           |
|--------------|-----------|-----------|-----------|
| H            | 3.213131  | -2.989175 | 1.170717  |
| H            | 3.174736  | -0.234831 | -1.47006  |
| C            | 0.4666    | -2.203344 | -2.030617 |
| O            | -0.593323 | -2.27921  | -1.543699 |
| O            | 1.498688  | -2.154397 | -2.580155 |
| <hr/>        |           |           |           |
| <hr/>        |           |           |           |
| <b>cp2-3</b> |           |           |           |
| <hr/>        |           |           |           |
| C            | -2.456451 | 0.017796  | 0.023229  |
| N            | -2.912129 | 1.308869  | 0.073425  |
| N            | -3.163478 | -0.892738 | -0.699415 |
| C            | -4.332654 | 1.632212  | 0.106519  |
| H            | -4.529102 | 2.321539  | 0.936342  |
| H            | -4.668577 | 2.114628  | -0.820502 |
| H            | -4.915491 | 0.72462   | 0.263088  |
| C            | -1.99536  | 2.446021  | 0.022978  |
| H            | -2.310494 | 3.123511  | -0.779916 |
| H            | -1.992308 | 3.010059  | 0.963504  |
| H            | -0.981628 | 2.109086  | -0.194968 |
| C            | -3.724982 | -0.554204 | -2.007116 |
| H            | -3.194714 | -1.114562 | -2.78552  |
| H            | -4.788879 | -0.811398 | -2.053812 |
| H            | -3.60505  | 0.50874   | -2.210417 |
| C            | -3.000468 | -2.332303 | -0.460298 |
| H            | -3.945934 | -2.826435 | -0.703572 |
| H            | -2.188124 | -2.742748 | -1.067002 |
| H            | -2.761009 | -2.502914 | 0.589535  |
| N            | -1.372807 | -0.37453  | 0.667223  |
| H            | -0.789088 | -1.149418 | 0.184332  |
| C            | -0.77114  | 0.264299  | 1.834657  |
| H            | 0.158327  | 0.754562  | 1.526847  |
| H            | -1.445479 | 1.025816  | 2.237156  |
| C            | -0.471919 | -0.777042 | 2.925339  |
| H            | 0.105478  | -0.261006 | 3.713533  |
| H            | -1.413135 | -1.108484 | 3.382137  |
| O            | 0.174232  | -1.931062 | 2.450796  |
| Br           | 2.030715  | 2.081063  | -0.228053 |
| C            | 3.237233  | 0.572156  | -0.729416 |
| C            | 3.081475  | -0.60346  | 0.227773  |
| O            | 1.749689  | -1.13001  | 0.227312  |
| H            | 4.238421  | 0.998939  | -0.683567 |



|   |           |           |           |
|---|-----------|-----------|-----------|
| H | 3.209448  | -0.22817  | 1.249565  |
| H | 0.836307  | -1.684981 | 1.77488   |
| C | 4.145357  | -1.675913 | -0.037593 |
| H | 4.059692  | -2.058446 | -1.054359 |
| H | 5.14925   | -1.267765 | 0.122585  |
| H | 3.998124  | -2.50276  | 0.663351  |
| H | 2.957669  | 0.302242  | -1.743437 |
| C | 1.187651  | -1.651774 | -1.007172 |
| O | -0.016256 | -1.977724 | -0.8282   |
| O | 1.903301  | -1.697427 | -2.001154 |

---

**cp2-4**

---

|    |           |           |           |
|----|-----------|-----------|-----------|
| C  | 2.271314  | -0.378224 | -0.544891 |
| N  | 3.545051  | -0.040562 | -0.196228 |
| N  | 1.936548  | -1.695539 | -0.591425 |
| C  | 4.673531  | -0.901623 | -0.531406 |
| H  | 5.470187  | -0.287514 | -0.966949 |
| H  | 5.082991  | -1.407129 | 0.352638  |
| H  | 4.366759  | -1.652933 | -1.258349 |
| C  | 3.864328  | 1.094808  | 0.673113  |
| H  | 4.403899  | 0.722402  | 1.552826  |
| H  | 4.513681  | 1.811711  | 0.155571  |
| H  | 2.954576  | 1.597935  | 1.006757  |
| C  | 2.245497  | -2.555404 | 0.561895  |
| H  | 1.379271  | -2.557744 | 1.234169  |
| H  | 2.46613   | -3.568829 | 0.2146    |
| H  | 3.103478  | -2.172252 | 1.110853  |
| C  | 0.743146  | -2.131462 | -1.329307 |
| H  | 0.888377  | -3.177053 | -1.615411 |
| H  | -0.148089 | -2.038002 | -0.698624 |
| H  | 0.610386  | -1.527201 | -2.2266   |
| N  | 1.361835  | 0.518513  | -0.91143  |
| H  | 0.397277  | 0.232507  | -0.729454 |
| C  | 1.506972  | 1.93794   | -1.220889 |
| H  | 2.563955  | 2.204406  | -1.220669 |
| H  | 1.109753  | 2.108052  | -2.228208 |
| C  | 0.699529  | 2.786716  | -0.215896 |
| H  | 0.905204  | 3.84364   | -0.423843 |
| H  | -0.368668 | 2.613504  | -0.395185 |
| Br | -0.55862  | -0.359563 | 1.574231  |

|   |           |           |           |
|---|-----------|-----------|-----------|
| C | -3.741374 | -0.640651 | 0.157005  |
| C | -3.620406 | 0.863639  | 0.494132  |
| O | -2.919647 | -0.774359 | -1.031207 |
| H | -3.24751  | -1.231738 | 0.931862  |
| H | -3.130515 | 1.018537  | 1.456709  |
| H | -4.573988 | 1.397069  | 0.439063  |
| C | -5.147723 | -1.128609 | -0.135793 |
| H | -5.136836 | -2.17531  | -0.451118 |
| H | -5.762914 | -1.051422 | 0.766927  |
| H | -5.61407  | -0.531245 | -0.925739 |
| C | -2.28199  | 0.380602  | -1.289567 |
| O | -2.753476 | 1.387148  | -0.528062 |
| O | -1.415989 | 0.513665  | -2.121792 |
| O | 1.040133  | 2.527999  | 1.129711  |
| H | 0.529241  | 1.734394  | 1.414098  |

---

**cp3-1**

---

|   |           |           |           |
|---|-----------|-----------|-----------|
| C | -1.315174 | 0.637625  | 0.414432  |
| N | -2.218284 | 1.130581  | -0.48112  |
| N | -1.736776 | -0.093848 | 1.47251   |
| C | -3.561759 | 1.537367  | -0.096903 |
| H | -3.782271 | 2.512209  | -0.547324 |
| H | -4.326846 | 0.828474  | -0.439452 |
| H | -3.626273 | 1.631302  | 0.987668  |
| C | -1.946534 | 1.01866   | -1.918808 |
| H | -2.825449 | 0.578438  | -2.401711 |
| H | -1.74781  | 1.994324  | -2.3783   |
| H | -1.116485 | 0.323398  | -2.067507 |
| C | -2.745543 | -1.148985 | 1.288954  |
| H | -2.22968  | -2.07447  | 1.008529  |
| H | -3.310876 | -1.263243 | 2.218222  |
| H | -3.428285 | -0.899487 | 0.481821  |
| C | -0.801871 | -0.384871 | 2.559963  |
| H | -1.380119 | -0.641312 | 3.451165  |
| H | -0.159837 | -1.231324 | 2.290023  |
| H | -0.182395 | 0.486989  | 2.770939  |
| N | -0.029491 | 0.996338  | 0.325019  |
| H | 0.678003  | 0.299617  | 0.584741  |
| C | 0.48301   | 2.1491    | -0.410411 |
| H | 0.920337  | 1.817911  | -1.36127  |

|    |           |           |           |
|----|-----------|-----------|-----------|
| H  | -0.356318 | 2.807468  | -0.646769 |
| C  | 1.531034  | 2.907044  | 0.413428  |
| H  | 1.059216  | 3.27392   | 1.333252  |
| H  | 2.315084  | 2.20807   | 0.72377   |
| Br | -0.33944  | -2.080251 | -0.970276 |
| C  | 3.434103  | -0.935949 | 0.285123  |
| C  | 2.607193  | -1.812069 | 1.125969  |
| O  | 2.42405   | -0.370305 | 1.159096  |
| H  | 4.444076  | -0.717102 | 0.638912  |
| H  | 3.02639   | -2.226561 | 2.042652  |
| H  | 1.77516   | -2.345162 | 0.66432   |
| C  | 3.213472  | -0.809216 | -1.199412 |
| H  | 3.422571  | 0.213445  | -1.536054 |
| H  | 3.899334  | -1.477445 | -1.732582 |
| H  | 2.185208  | -1.083811 | -1.45731  |
| C  | 2.140196  | 4.073732  | -0.369195 |
| H  | 2.881939  | 4.605432  | 0.233845  |
| H  | 2.640917  | 3.724656  | -1.279026 |
| H  | 1.375509  | 4.79934   | -0.669352 |

---

**cp3-2**

---

|   |           |           |           |
|---|-----------|-----------|-----------|
| C | -2.156367 | -0.867701 | 0.347353  |
| N | -3.026297 | -1.791001 | -0.228844 |
| N | -1.939175 | -1.041103 | 1.706807  |
| C | -4.204177 | -2.295063 | 0.458329  |
| H | -5.098039 | -2.136216 | -0.159906 |
| H | -4.133031 | -3.372044 | 0.670595  |
| H | -4.333885 | -1.762741 | 1.400367  |
| C | -2.788121 | -2.327733 | -1.557618 |
| H | -2.811854 | -3.425833 | -1.524942 |
| H | -3.539135 | -1.996814 | -2.287795 |
| H | -1.803623 | -2.019839 | -1.909717 |
| C | -1.60266  | -2.356307 | 2.240852  |
| H | -0.517522 | -2.453735 | 2.39498   |
| H | -2.09613  | -2.518827 | 3.205957  |
| H | -1.919071 | -3.138312 | 1.551435  |
| C | -1.417543 | 0.075731  | 2.487876  |
| H | -1.707996 | -0.066768 | 3.534413  |
| H | -0.325594 | 0.159392  | 2.428381  |
| H | -1.837907 | 1.010588  | 2.11855   |

|    |           |           |           |
|----|-----------|-----------|-----------|
| N  | -1.588143 | 0.117488  | -0.277539 |
| H  | 0.021915  | 0.80365   | 0.140711  |
| C  | -2.156926 | 0.65631   | -1.508551 |
| H  | -1.57662  | 0.321614  | -2.382691 |
| H  | -3.189192 | 0.310858  | -1.667502 |
| C  | -2.134861 | 2.190428  | -1.470227 |
| H  | -2.742504 | 2.528716  | -0.622049 |
| H  | -1.11114  | 2.519523  | -1.259529 |
| Br | 3.814588  | -1.640934 | -0.439477 |
| C  | 1.975386  | 0.650753  | -0.287821 |
| C  | 2.165097  | -0.772876 | 0.245812  |
| O  | 0.884077  | 1.22297   | 0.415034  |
| H  | 2.856442  | 1.239697  | -0.008567 |
| H  | 2.26987   | -0.766491 | 1.32947   |
| H  | 1.344514  | -1.427922 | -0.05071  |
| C  | 1.794065  | 0.709308  | -1.804016 |
| H  | 1.654369  | 1.746538  | -2.120309 |
| H  | 2.665813  | 0.297445  | -2.318895 |
| H  | 0.91258   | 0.133989  | -2.109284 |
| C  | 0.893213  | 3.645669  | 1.547485  |
| O  | 2.028154  | 3.793697  | 1.307678  |
| O  | -0.241649 | 3.571339  | 1.822399  |
| C  | -2.643122 | 2.822091  | -2.768521 |
| H  | -2.61969  | 3.914781  | -2.712726 |
| H  | -2.029905 | 2.521532  | -3.626066 |
| H  | -3.676476 | 2.524512  | -2.98207  |

---

**cp3-3**

---

|   |           |           |           |
|---|-----------|-----------|-----------|
| C | -2.497616 | -0.876438 | -0.022888 |
| N | -3.679847 | -1.160654 | -0.652295 |
| N | -2.124738 | -1.647601 | 1.024836  |
| C | -4.880443 | -1.531617 | 0.091569  |
| H | -5.695746 | -0.847431 | -0.170949 |
| H | -5.203452 | -2.554177 | -0.13827  |
| H | -4.696709 | -1.448201 | 1.162106  |
| C | -3.851228 | -0.991685 | -2.090163 |
| H | -4.372866 | -1.868646 | -2.489781 |
| H | -4.443114 | -0.101077 | -2.335638 |
| H | -2.877127 | -0.919546 | -2.573347 |
| C | -2.448982 | -3.071448 | 1.087815  |

|    |           |           |           |
|----|-----------|-----------|-----------|
| H  | -1.523287 | -3.638384 | 1.233165  |
| H  | -3.119469 | -3.292855 | 1.92603   |
| H  | -2.91503  | -3.400269 | 0.159672  |
| C  | -1.202794 | -1.173296 | 2.067442  |
| H  | -1.615023 | -1.459282 | 3.040952  |
| H  | -0.220576 | -1.642201 | 1.947775  |
| H  | -1.068837 | -0.087809 | 2.01957   |
| N  | -1.718439 | 0.114737  | -0.442415 |
| H  | -0.730702 | 0.137265  | -0.113751 |
| C  | -2.177651 | 1.409648  | -0.9778   |
| H  | -1.260029 | 1.960008  | -1.195882 |
| H  | -2.704164 | 1.273493  | -1.927562 |
| C  | -3.031897 | 2.213023  | 0.010015  |
| H  | -3.932451 | 1.638327  | 0.267142  |
| H  | -2.440314 | 2.343879  | 0.920187  |
| Br | 4.917506  | -0.540517 | -0.385541 |
| C  | 2.118846  | 0.309609  | -0.485903 |
| C  | 3.143664  | -0.293812 | 0.474364  |
| O  | 0.912371  | 0.496712  | 0.257943  |
| H  | 2.493102  | 1.28731   | -0.80571  |
| H  | 3.314589  | 0.387688  | 1.303387  |
| H  | 2.845586  | -1.283409 | 0.823226  |
| C  | 1.808119  | -0.574297 | -1.688179 |
| H  | 1.074046  | -0.088299 | -2.338174 |
| H  | 2.714331  | -0.767923 | -2.266967 |
| H  | 1.396515  | -1.537343 | -1.363119 |
| C  | 0.837769  | 1.73351   | 1.14673   |
| O  | 1.8621    | 2.399226  | 1.192119  |
| O  | -0.295258 | 1.79829   | 1.649239  |
| C  | -3.433724 | 3.571609  | -0.570708 |
| H  | -4.046551 | 4.132149  | 0.141186  |
| H  | -2.550651 | 4.179596  | -0.793286 |
| H  | -4.011685 | 3.467178  | -1.497072 |

---

**cp3-4**

---

|   |           |           |           |
|---|-----------|-----------|-----------|
| C | -1.949754 | -0.52428  | 0.521116  |
| N | -2.948833 | -0.973129 | -0.290317 |
| N | -1.493543 | -1.311093 | 1.527258  |
| C | -3.990729 | -1.868632 | 0.192558  |
| H | -4.963349 | -1.504338 | -0.157718 |

|    |           |           |           |
|----|-----------|-----------|-----------|
| H  | -3.862637 | -2.89429  | -0.177296 |
| H  | -3.993321 | -1.883087 | 1.282733  |
| C  | -2.87281  | -0.784428 | -1.743431 |
| H  | -3.065067 | -1.749593 | -2.22381  |
| H  | -3.614233 | -0.061234 | -2.102992 |
| H  | -1.855781 | -0.491959 | -2.013651 |
| C  | -1.153213 | -2.717033 | 1.25398   |
| H  | -0.13729  | -2.758916 | 0.84451   |
| H  | -1.241304 | -3.287659 | 2.18252   |
| H  | -1.821379 | -3.141837 | 0.509318  |
| C  | -0.703056 | -0.719722 | 2.610617  |
| H  | -0.775376 | -1.378373 | 3.480109  |
| H  | 0.34958   | -0.608919 | 2.329194  |
| H  | -1.10225  | 0.260889  | 2.871023  |
| N  | -1.510229 | 0.731602  | 0.417183  |
| H  | -0.533198 | 0.901813  | 0.666992  |
| C  | -2.153404 | 1.817666  | -0.319627 |
| H  | -1.76874  | 1.846415  | -1.346969 |
| H  | -3.226093 | 1.609608  | -0.370551 |
| C  | -1.894397 | 3.163474  | 0.365117  |
| H  | -2.314803 | 3.136493  | 1.377885  |
| H  | -0.813139 | 3.297295  | 0.477252  |
| Br | 0.66482   | -1.239524 | -1.319091 |
| C  | 3.665052  | -0.34837  | 0.067419  |
| C  | 3.508845  | 0.688372  | -1.068608 |
| O  | 2.767427  | 0.161391  | 1.091078  |
| H  | 3.237549  | -1.302264 | -0.250577 |
| H  | 3.086335  | 0.231366  | -1.964955 |
| H  | 4.430376  | 1.236175  | -1.286975 |
| C  | 5.063591  | -0.48693  | 0.637746  |
| H  | 5.068129  | -1.170239 | 1.491229  |
| H  | 5.73495   | -0.89412  | -0.125698 |
| H  | 5.456318  | 0.481575  | 0.963975  |
| C  | 2.062574  | 1.195571  | 0.609798  |
| O  | 2.540329  | 1.628525  | -0.562979 |
| O  | 1.134461  | 1.711611  | 1.199598  |
| C  | -2.494307 | 4.328786  | -0.426095 |
| H  | -2.296492 | 5.281819  | 0.07291   |
| H  | -2.06647  | 4.387387  | -1.432928 |
| H  | -3.58086  | 4.228627  | -0.531331 |

---

| <b>cp4-1</b> |           |           |           |
|--------------|-----------|-----------|-----------|
| C            | -1.396284 | 0.532754  | 0.344257  |
| N            | -2.414888 | 0.641948  | -0.556709 |
| N            | -1.577733 | -0.160822 | 1.492472  |
| C            | -3.812421 | 0.694911  | -0.15266  |
| H            | -4.310241 | 1.508857  | -0.692579 |
| H            | -4.34861  | -0.235772 | -0.379517 |
| H            | -3.882686 | 0.891688  | 0.917639  |
| C            | -2.14507  | 0.437811  | -1.984942 |
| H            | -2.883118 | -0.270898 | -2.375235 |
| H            | -2.220558 | 1.369843  | -2.557668 |
| H            | -1.162253 | -0.028143 | -2.094361 |
| C            | -2.235643 | -1.476497 | 1.464421  |
| H            | -1.473738 | -2.239471 | 1.267859  |
| H            | -2.740293 | -1.640986 | 2.420706  |
| H            | -2.963056 | -1.530617 | 0.659582  |
| C            | -0.593225 | -0.039213 | 2.568046  |
| H            | -1.06887  | -0.339937 | 3.504977  |
| H            | 0.264953  | -0.69271  | 2.373543  |
| H            | -0.250672 | 0.992248  | 2.652886  |
| N            | -0.269592 | 1.229578  | 0.160672  |
| H            | 0.610795  | 0.800424  | 0.468484  |
| C            | -0.11546  | 2.372843  | -0.736536 |
| H            | 0.343608  | 2.044785  | -1.67729  |
| H            | -1.110434 | 2.756901  | -0.971404 |
| C            | 0.735776  | 3.463078  | -0.08401  |
| H            | 0.24292   | 3.862893  | 0.807425  |
| H            | 1.711302  | 3.07147   | 0.214759  |
| Br           | 0.318413  | -1.933599 | -0.781434 |
| C            | 3.606233  | 0.363616  | 0.205631  |
| C            | 3.06421   | -0.606795 | 1.166108  |
| O            | 2.479426  | 0.719     | 1.047874  |
| H            | 4.513496  | 0.897205  | 0.497544  |
| H            | 3.586717  | -0.778145 | 2.107112  |
| H            | 2.415908  | -1.401669 | 0.795327  |
| C            | 3.354645  | 0.251437  | -1.275143 |
| H            | 3.265721  | 1.245573  | -1.729581 |
| H            | 4.199574  | -0.255254 | -1.755312 |
| H            | 2.444995  | -0.328019 | -1.46462  |

|              |           |           |           |
|--------------|-----------|-----------|-----------|
| H            | 0.893581  | 4.28511   | -0.789164 |
| <b>cp4-2</b> |           |           |           |
| C            | 2.375045  | -0.402885 | -0.140765 |
| N            | 3.318824  | -1.340606 | 0.274622  |
| N            | 2.291755  | -0.229801 | -1.514399 |
| C            | 4.6131    | -1.489796 | -0.37031  |
| H            | 5.418151  | -1.387487 | 0.370033  |
| H            | 4.726345  | -2.471959 | -0.85232  |
| H            | 4.736191  | -0.714881 | -1.126624 |
| C            | 3.054659  | -2.239836 | 1.38462   |
| H            | 3.241947  | -3.277493 | 1.075286  |
| H            | 3.686952  | -2.030673 | 2.258361  |
| H            | 2.010168  | -2.159078 | 1.685848  |
| C            | 2.204372  | -1.382701 | -2.404194 |
| H            | 1.163559  | -1.566101 | -2.71026  |
| H            | 2.798054  | -1.216163 | -3.310334 |
| H            | 2.574035  | -2.277462 | -1.904485 |
| C            | 1.669544  | 0.981318  | -2.039159 |
| H            | 2.057139  | 1.162297  | -3.047491 |
| H            | 0.576067  | 0.907969  | -2.084281 |
| H            | 1.913532  | 1.828042  | -1.39868  |
| N            | 1.626635  | 0.306877  | 0.647101  |
| H            | -0.020309 | 0.912063  | 0.241589  |
| C            | 2.016758  | 0.555883  | 2.031926  |
| H            | 1.406644  | -0.051868 | 2.716564  |
| H            | 3.064266  | 0.279056  | 2.21498   |
| C            | 1.809886  | 2.034953  | 2.369887  |
| H            | 2.465638  | 2.665726  | 1.761761  |
| H            | 0.77826   | 2.334082  | 2.16467   |
| Br           | -3.49186  | -1.990183 | -0.116963 |
| C            | -1.968641 | 0.468945  | 0.420963  |
| C            | -1.917054 | -0.816395 | -0.410826 |
| O            | -0.903252 | 1.298653  | -0.013674 |
| H            | -2.890122 | 1.004339  | 0.165328  |
| H            | -1.922025 | -0.586456 | -1.47506  |
| H            | -1.047251 | -1.425521 | -0.160235 |
| C            | -1.939151 | 0.21747   | 1.928159  |
| H            | -1.960681 | 1.171643  | 2.461425  |
| H            | -2.796913 | -0.382437 | 2.242909  |



|              |           |           |           |
|--------------|-----------|-----------|-----------|
| H            | -1.025431 | -0.316378 | 2.213266  |
| C            | -1.165771 | 3.876989  | -0.682945 |
| O            | -2.322579 | 3.835757  | -0.51699  |
| O            | -0.017116 | 3.996772  | -0.870593 |
| H            | 2.027482  | 2.226722  | 3.426113  |
| <hr/>        |           |           |           |
| <b>cp4-3</b> |           |           |           |
| N            | -2.385762 | -1.152961 | 1.13964   |
| C            | -5.126431 | -0.962425 | 0.180843  |
| H            | -5.88825  | -0.259284 | -0.175355 |
| H            | -5.527497 | -1.978938 | 0.088033  |
| H            | -4.931365 | -0.751176 | 1.231626  |
| C            | -4.070349 | -0.796787 | -2.048284 |
| H            | -4.659649 | -1.676214 | -2.331332 |
| H            | -4.593434 | 0.096487  | -2.411876 |
| H            | -3.096111 | -0.863854 | -2.531982 |
| C            | -2.808296 | -2.529283 | 1.392251  |
| H            | -1.923428 | -3.136285 | 1.611912  |
| H            | -3.484704 | -2.589149 | 2.252477  |
| H            | -3.304956 | -2.94432  | 0.516066  |
| C            | -1.427165 | -0.607597 | 2.112056  |
| H            | -1.84941  | -0.73779  | 3.11402   |
| H            | -0.477136 | -1.149132 | 2.055275  |
| H            | -1.226305 | 0.45173   | 1.922667  |
| N            | -1.850798 | 0.351941  | -0.554831 |
| H            | -0.864709 | 0.349726  | -0.220454 |
| C            | -2.209518 | 1.591276  | -1.271999 |
| H            | -1.250697 | 2.047467  | -1.522656 |
| H            | -2.71274  | 1.359229  | -2.214863 |
| C            | -3.03301  | 2.562326  | -0.426313 |
| H            | -3.994538 | 2.127095  | -0.13151  |
| H            | -2.460871 | 2.834507  | 0.462818  |
| Br           | 4.712978  | -0.771556 | -0.244731 |
| C            | 1.999028  | 0.281084  | -0.552921 |
| C            | 2.945433  | -0.2711   | 0.51241   |
| O            | 0.794299  | 0.658055  | 0.118007  |
| H            | 2.461276  | 1.175738  | -0.9823   |
| H            | 3.152769  | 0.497436  | 1.252413  |
| H            | 2.555892  | -1.178903 | 0.975093  |
| C            | 1.644901  | -0.723665 | -1.643129 |

|   |           |           |           |
|---|-----------|-----------|-----------|
| H | 0.963203  | -0.270536 | -2.36944  |
| H | 2.544118  | -1.056481 | -2.166972 |
| H | 1.153698  | -1.604631 | -1.212711 |
| C | 0.798169  | 2.002033  | 0.839498  |
| O | 1.873061  | 2.583995  | 0.839358  |
| O | -0.339132 | 2.21937   | 1.286336  |
| H | -3.24153  | 3.466609  | -1.007213 |

---

**cp4-4**

---

|    |           |           |           |
|----|-----------|-----------|-----------|
| C  | -2.105897 | 0.070102  | 0.464195  |
| N  | -3.141705 | -0.362663 | -0.308951 |
| N  | -1.794116 | -0.592508 | 1.605919  |
| C  | -4.313383 | -1.009413 | 0.26556   |
| H  | -5.21462  | -0.578236 | -0.185273 |
| H  | -4.32708  | -2.090648 | 0.076464  |
| H  | -4.342722 | -0.837667 | 1.341798  |
| C  | -3.008067 | -0.433239 | -1.768505 |
| H  | -3.336062 | -1.426156 | -2.09382  |
| H  | -3.622835 | 0.320412  | -2.274506 |
| H  | -1.952866 | -0.344499 | -2.036722 |
| C  | -1.65556  | -2.057761 | 1.580505  |
| H  | -0.64089  | -2.308775 | 1.250963  |
| H  | -1.868269 | -2.450471 | 2.578685  |
| H  | -2.34478  | -2.500496 | 0.86628   |
| C  | -0.950863 | 0.056059  | 2.613872  |
| H  | -1.128073 | -0.439132 | 3.572101  |
| H  | 0.112119  | -0.018296 | 2.360832  |
| H  | -1.218138 | 1.109611  | 2.70163   |
| N  | -1.483901 | 1.215895  | 0.17955   |
| H  | -0.499319 | 1.28794   | 0.447992  |
| C  | -1.93975  | 2.241112  | -0.758603 |
| H  | -1.537063 | 2.031006  | -1.756571 |
| H  | -3.029829 | 2.185879  | -0.818889 |
| C  | -1.484753 | 3.623654  | -0.29333  |
| H  | -1.937488 | 3.884888  | 0.66794   |
| H  | -0.397924 | 3.650058  | -0.179292 |
| Br | 0.405107  | -1.312996 | -1.114124 |
| C  | 3.500241  | -0.614424 | 0.173966  |
| C  | 3.483819  | 0.233569  | -1.118413 |
| O  | 2.688418  | 0.176189  | 1.084422  |

|   |           |           |           |
|---|-----------|-----------|-----------|
| H | 2.941671  | -1.539014 | 0.008847  |
| H | 3.01648   | -0.308444 | -1.941676 |
| H | 4.468223  | 0.62301   | -1.395172 |
| C | 4.868023  | -0.850893 | 0.78476   |
| H | 4.780099  | -1.380259 | 1.737359  |
| H | 5.472956  | -1.466143 | 0.110334  |
| H | 5.393466  | 0.093836  | 0.958001  |
| C | 2.115251  | 1.19175   | 0.422835  |
| O | 2.634412  | 1.353349  | -0.799966 |
| O | 1.263953  | 1.914242  | 0.901854  |
| H | -1.776363 | 4.378042  | -1.030139 |

---



---

|              |           |           |           |
|--------------|-----------|-----------|-----------|
| <b>cp5-1</b> |           |           |           |
| C            | -1.358915 | 0.585444  | 0.399872  |
| N            | -2.27608  | 1.033615  | -0.50331  |
| N            | -1.753191 | -0.160618 | 1.457967  |
| C            | -3.635078 | 1.396658  | -0.130445 |
| H            | -3.884553 | 2.361929  | -0.586181 |
| H            | -4.373191 | 0.660955  | -0.475752 |
| H            | -3.710545 | 1.492697  | 0.953257  |
| C            | -1.986058 | 0.930126  | -1.93822  |
| H            | -2.848178 | 0.466559  | -2.429347 |
| H            | -1.808113 | 1.910116  | -2.396347 |
| H            | -1.135265 | 0.258014  | -2.07657  |
| C            | -2.720178 | -1.254664 | 1.273372  |
| H            | -2.170164 | -2.15126  | 0.963939  |
| H            | -3.257507 | -1.411308 | 2.212738  |
| H            | -3.434744 | -1.018168 | 0.489983  |
| C            | -0.804762 | -0.420645 | 2.54205   |
| H            | -1.370158 | -0.699174 | 3.434795  |
| H            | -0.135393 | -1.243586 | 2.265411  |
| H            | -0.215622 | 0.472049  | 2.752665  |
| N            | -0.08744  | 0.99563   | 0.312772  |
| H            | 0.644743  | 0.322368  | 0.564184  |
| C            | 0.374039  | 2.168013  | -0.421741 |
| H            | 0.846263  | 1.857339  | -1.363182 |
| H            | -0.479744 | 2.798055  | -0.672413 |
| C            | 1.368543  | 2.981296  | 0.415931  |
| H            | 0.844662  | 3.373857  | 1.294918  |
| H            | 2.160567  | 2.31342   | 0.788543  |

|    |          |           |           |
|----|----------|-----------|-----------|
| N  | 1.842274 | 4.116444  | -0.38197  |
| H  | 2.366003 | 4.75765   | 0.207703  |
| H  | 2.496104 | 3.790248  | -1.090798 |
| Br | -0.21966 | -2.097185 | -0.935206 |
| C  | 3.491435 | -0.757709 | 0.273785  |
| C  | 2.714271 | -1.664544 | 1.129468  |
| O  | 2.453199 | -0.234684 | 1.140313  |
| H  | 4.488888 | -0.479871 | 0.62207   |
| H  | 3.15675  | -2.041682 | 2.051308  |
| H  | 1.911634 | -2.248409 | 0.677415  |
| C  | 3.263288 | -0.666449 | -1.212376 |
| H  | 3.41896  | 0.360123  | -1.566304 |
| H  | 3.982415 | -1.306427 | -1.736288 |
| H  | 2.250246 | -0.99718  | -1.464426 |

---

**cp5-2**

---

|   |           |           |           |
|---|-----------|-----------|-----------|
| C | -2.15552  | -0.857243 | 0.339545  |
| N | -3.011437 | -1.792652 | -0.235756 |
| N | -1.952035 | -1.015795 | 1.70233   |
| C | -4.206067 | -2.279768 | 0.435262  |
| H | -5.089575 | -2.107136 | -0.194062 |
| H | -4.151978 | -3.357665 | 0.646738  |
| H | -4.340681 | -1.74662  | 1.376129  |
| C | -2.77002  | -2.323402 | -1.566516 |
| H | -2.811711 | -3.42086  | -1.539603 |
| H | -3.508063 | -1.975642 | -2.301801 |
| H | -1.777011 | -2.029659 | -1.906862 |
| C | -1.635325 | -2.325614 | 2.260555  |
| H | -0.556129 | -2.42115  | 2.452183  |
| H | -2.160953 | -2.479371 | 3.210153  |
| H | -1.928492 | -3.11354  | 1.567724  |
| C | -1.443529 | 0.10893   | 2.480055  |
| H | -1.753577 | -0.020645 | 3.522684  |
| H | -0.350442 | 0.189718  | 2.439844  |
| H | -1.855246 | 1.040151  | 2.09216   |
| N | -1.582878 | 0.123778  | -0.289316 |
| H | 0.0217    | 0.806632  | 0.144984  |
| C | -2.144997 | 0.647582  | -1.528027 |
| H | -1.552682 | 0.317067  | -2.396636 |
| H | -3.175036 | 0.312934  | -1.703596 |

|    |           |           |           |
|----|-----------|-----------|-----------|
| C  | -2.130689 | 2.180861  | -1.493946 |
| H  | -2.793251 | 2.517877  | -0.688823 |
| H  | -1.116723 | 2.518048  | -1.225439 |
| N  | -2.641388 | 2.712025  | -2.762744 |
| H  | -2.76568  | 3.718448  | -2.688344 |
| H  | -1.948824 | 2.5714    | -3.495926 |
| Br | 3.797093  | -1.663662 | -0.411798 |
| C  | 1.977888  | 0.643679  | -0.265194 |
| C  | 2.14767   | -0.785429 | 0.26022   |
| O  | 0.88362   | 1.221737  | 0.428058  |
| H  | 2.861174  | 1.222236  | 0.028297  |
| H  | 2.239484  | -0.787725 | 1.345065  |
| H  | 1.324569  | -1.430464 | -0.050744 |
| C  | 1.814945  | 0.71453   | -1.783079 |
| H  | 1.689354  | 1.755631  | -2.092918 |
| H  | 2.688538  | 0.297973  | -2.290952 |
| H  | 0.931475  | 0.149824  | -2.102163 |
| C  | 0.886581  | 3.671962  | 1.493085  |
| O  | 2.029729  | 3.801878  | 1.28383   |
| O  | -0.257088 | 3.61797   | 1.734547  |

---

**cp5-3**

---

|   |           |           |           |
|---|-----------|-----------|-----------|
| C | -2.512839 | -0.864208 | -0.0264   |
| N | -3.700126 | -1.137216 | -0.648792 |
| N | -2.139749 | -1.637116 | 1.020589  |
| C | -4.897984 | -1.505474 | 0.10127   |
| H | -5.710541 | -0.814772 | -0.152246 |
| H | -5.228647 | -2.524495 | -0.132961 |
| H | -4.706732 | -1.430187 | 1.171121  |
| C | -3.88411  | -0.948873 | -2.083812 |
| H | -4.425568 | -1.812644 | -2.485264 |
| H | -4.461152 | -0.04457  | -2.312422 |
| H | -2.914084 | -0.889709 | -2.576696 |
| C | -2.470387 | -3.059385 | 1.085291  |
| H | -1.546696 | -3.630982 | 1.225241  |
| H | -3.13748  | -3.27802  | 1.926951  |
| H | -2.942967 | -3.385542 | 0.159497  |
| C | -1.208483 | -1.166495 | 2.056567  |
| H | -1.614737 | -1.450683 | 3.033118  |
| H | -0.228523 | -1.63835  | 1.930308  |

|    |           |           |           |
|----|-----------|-----------|-----------|
| H  | -1.071314 | -0.081592 | 2.007456  |
| N  | -1.726091 | 0.119959  | -0.449803 |
| H  | -0.738097 | 0.132858  | -0.124229 |
| C  | -2.175188 | 1.41476   | -0.986811 |
| H  | -1.255241 | 1.964728  | -1.196224 |
| H  | -2.709877 | 1.303313  | -1.932303 |
| C  | -3.029877 | 2.218642  | 0.002006  |
| H  | -3.963754 | 1.675439  | 0.197874  |
| H  | -2.468401 | 2.299299  | 0.940639  |
| N  | -3.376359 | 3.499152  | -0.627743 |
| H  | -4.077575 | 3.973828  | -0.064406 |
| H  | -2.55814  | 4.105937  | -0.607595 |
| Br | 4.922002  | -0.549829 | -0.368783 |
| C  | 2.121315  | 0.288149  | -0.491001 |
| C  | 3.147194  | -0.288714 | 0.484165  |
| O  | 0.91341   | 0.490589  | 0.24763   |
| H  | 2.493057  | 1.2585    | -0.835064 |
| H  | 3.315311  | 0.413019  | 1.296722  |
| H  | 2.852068  | -1.270636 | 0.856416  |
| C  | 1.811875  | -0.626168 | -1.670521 |
| H  | 1.077007  | -0.157955 | -2.332484 |
| H  | 2.718366  | -0.833018 | -2.244267 |
| H  | 1.40186   | -1.581303 | -1.321069 |
| C  | 0.836657  | 1.743429  | 1.106847  |
| O  | 1.858468  | 2.41456   | 1.138327  |
| O  | -0.296999 | 1.819118  | 1.608284  |

---

**cp5-4**

---

|   |          |           |           |
|---|----------|-----------|-----------|
| C | 2.530021 | -0.367456 | -0.133165 |
| N | 3.876723 | -0.152402 | -0.243655 |
| N | 2.066567 | -1.636687 | -0.209726 |
| C | 4.721651 | -0.951547 | -1.123837 |
| H | 5.322508 | -0.28429  | -1.752374 |
| H | 5.406562 | -1.59886  | -0.561622 |
| H | 4.100259 | -1.570691 | -1.770419 |
| C | 4.553931 | 0.883792  | 0.531203  |
| H | 5.44165  | 0.451169  | 1.006707  |
| H | 4.873715 | 1.724729  | -0.095267 |
| H | 3.891611 | 1.254061  | 1.312588  |
| C | 2.761541 | -2.741644 | 0.448972  |

|    |           |           |           |
|----|-----------|-----------|-----------|
| H  | 2.10193   | -3.175495 | 1.208248  |
| H  | 3.028471  | -3.524931 | -0.269348 |
| H  | 3.664783  | -2.384577 | 0.942453  |
| C  | 0.693063  | -1.934486 | -0.647988 |
| H  | 0.702505  | -2.922069 | -1.118697 |
| H  | -0.002674 | -1.916008 | 0.196297  |
| H  | 0.362369  | -1.195808 | -1.378455 |
| N  | 1.687006  | 0.646037  | 0.022751  |
| H  | 0.798209  | 0.442884  | 0.548852  |
| C  | 1.899885  | 2.014907  | -0.476037 |
| H  | 2.348713  | 2.646772  | 0.299009  |
| H  | 2.592663  | 1.951969  | -1.320946 |
| C  | 0.586947  | 2.670547  | -0.91495  |
| H  | 0.863883  | 3.536381  | -1.530362 |
| H  | 0.039531  | 1.971954  | -1.565819 |
| N  | -0.163889 | 3.162032  | 0.243647  |
| H  | -1.000073 | 3.633765  | -0.094391 |
| H  | -0.508727 | 2.369662  | 0.793529  |
| Br | -0.872276 | 0.046559  | 1.860126  |
| C  | -3.694677 | -0.892996 | 0.015301  |
| C  | -3.786315 | 0.648563  | 0.067676  |
| O  | -2.752357 | -1.125335 | -1.061739 |
| H  | -3.215039 | -1.262374 | 0.924707  |
| H  | -3.408919 | 1.0338    | 1.016057  |
| H  | -4.789227 | 1.028262  | -0.150578 |
| C  | -4.999112 | -1.608728 | -0.283867 |
| H  | -4.83551  | -2.68444  | -0.390968 |
| H  | -5.705644 | -1.452381 | 0.538273  |
| H  | -5.451449 | -1.23159  | -1.206773 |
| C  | -2.265171 | 0.042069  | -1.525284 |
| O  | -2.900595 | 1.095702  | -0.974735 |
| O  | -1.393032 | 0.131828  | -2.354073 |

---

**cp6-1**

---

|   |          |           |           |
|---|----------|-----------|-----------|
| C | 1.533138 | -0.969238 | 0.115188  |
| N | 1.423267 | -2.290818 | -0.22671  |
| N | 2.768431 | -0.468577 | 0.381164  |
| C | 2.290643 | -3.316606 | 0.339781  |
| H | 1.676237 | -4.136487 | 0.730034  |
| H | 2.977881 | -3.733601 | -0.407408 |

|    |           |           |           |
|----|-----------|-----------|-----------|
| H  | 2.872893  | -2.896473 | 1.159507  |
| C  | 0.44274   | -2.750352 | -1.207184 |
| H  | 0.947946  | -3.373323 | -1.954509 |
| H  | -0.354232 | -3.344672 | -0.745394 |
| H  | -0.001781 | -1.897269 | -1.717281 |
| C  | 3.919996  | -0.799185 | -0.457976 |
| H  | 4.253038  | 0.100096  | -0.988072 |
| H  | 4.75157   | -1.175966 | 0.147897  |
| H  | 3.647665  | -1.551181 | -1.19735  |
| C  | 2.929624  | 0.731127  | 1.216946  |
| H  | 3.935705  | 0.705917  | 1.645444  |
| H  | 2.768632  | 1.651888  | 0.644075  |
| H  | 2.196705  | 0.707708  | 2.024714  |
| N  | 0.476402  | -0.181423 | 0.215815  |
| H  | 0.600434  | 0.868675  | -0.021204 |
| C  | -0.899585 | -0.588962 | 0.495392  |
| H  | -1.48804  | -0.662319 | -0.424348 |
| H  | -0.896587 | -1.577432 | 0.968921  |
| C  | -1.565603 | 0.455105  | 1.40333   |
| H  | -1.000034 | 0.530028  | 2.345826  |
| H  | -1.480466 | 1.428658  | 0.90975   |
| N  | -2.981532 | 0.115309  | 1.583333  |
| H  | -3.09548  | -0.559206 | 2.33617   |
| H  | -3.505934 | 0.94054   | 1.857924  |
| Br | 0.641434  | 2.802336  | -0.561986 |
| C  | -4.752337 | -0.757612 | -0.561272 |
| O  | -5.608528 | -0.154687 | -0.042158 |
| O  | -3.948226 | -1.389619 | -1.131046 |

---

**cp7-1**

---

|   |           |           |           |
|---|-----------|-----------|-----------|
| C | 2.19576   | 0.330779  | -0.81096  |
| H | 1.775949  | -0.205042 | -1.665416 |
| H | 2.278484  | 1.391035  | -1.07566  |
| C | 1.288524  | 0.144076  | 0.409436  |
| H | 1.305828  | -0.891782 | 0.751346  |
| H | 1.601143  | 0.798106  | 1.227929  |
| N | -0.125945 | 0.43461   | 0.08646   |
| H | -0.696478 | 0.402654  | 0.988907  |
| C | -0.862334 | -0.638538 | -0.887473 |
| O | -1.825695 | -0.116746 | -1.456492 |



|    |           |           |           |
|----|-----------|-----------|-----------|
| O  | -0.353578 | -1.749548 | -0.83689  |
| C  | -4.494677 | 2.195292  | 0.374851  |
| H  | -5.090606 | 2.462906  | 1.257144  |
| H  | -5.092054 | 2.428445  | -0.50797  |
| C  | -3.165642 | 2.985574  | 0.418881  |
| H  | -2.658601 | 2.698407  | 1.34679   |
| H  | -3.402073 | 4.052003  | 0.496926  |
| N  | -2.241506 | 2.780024  | -0.696806 |
| H  | -2.498702 | 3.334804  | -1.507502 |
| H  | -0.267324 | 1.37946   | -0.289247 |
| H  | -2.203044 | 1.799821  | -0.981755 |
| C  | 4.007239  | -1.26535  | -0.162864 |
| N  | 3.401258  | -2.420281 | -0.56568  |
| N  | 5.10221   | -1.354884 | 0.636152  |
| C  | 3.241039  | -3.563685 | 0.328841  |
| H  | 2.178627  | -3.825285 | 0.387688  |
| H  | 3.795025  | -4.440103 | -0.029585 |
| H  | 3.592156  | -3.307153 | 1.328168  |
| C  | 2.745785  | -2.540768 | -1.868781 |
| H  | 3.006275  | -3.516056 | -2.295099 |
| H  | 1.656229  | -2.466701 | -1.783642 |
| H  | 3.122292  | -1.767959 | -2.539671 |
| C  | 6.107618  | -2.398146 | 0.442457  |
| H  | 7.070324  | -1.932806 | 0.203565  |
| H  | 6.230506  | -3.003844 | 1.347482  |
| H  | 5.823568  | -3.046864 | -0.385227 |
| C  | 5.519672  | -0.224933 | 1.479544  |
| H  | 6.097276  | -0.628007 | 2.315941  |
| H  | 6.105396  | 0.513887  | 0.921654  |
| H  | 4.63938   | 0.28923   | 1.866121  |
| N  | 3.569485  | -0.065392 | -0.521543 |
| H  | 4.245369  | 0.782642  | -0.537614 |
| Br | 5.086995  | 2.573751  | -0.696993 |
| C  | -4.63176  | -0.233196 | -0.353345 |
| N  | -5.197431 | -0.028503 | -1.577686 |
| N  | -4.545287 | -1.511637 | 0.09759   |
| C  | -6.235245 | -0.921146 | -2.085212 |
| H  | -7.039975 | -0.315876 | -2.517274 |
| H  | -5.856174 | -1.591464 | -2.866652 |
| H  | -6.64384  | -1.520366 | -1.272518 |

|    |           |           |           |
|----|-----------|-----------|-----------|
| C  | -4.714055 | 0.952168  | -2.545599 |
| H  | -4.440455 | 0.434701  | -3.472246 |
| H  | -5.489902 | 1.692215  | -2.77713  |
| H  | -3.827414 | 1.451422  | -2.169506 |
| C  | -4.001477 | -2.55971  | -0.775528 |
| H  | -3.038433 | -2.894833 | -0.376791 |
| H  | -4.68803  | -3.411123 | -0.835431 |
| H  | -3.810386 | -2.158752 | -1.768405 |
| C  | -4.510484 | -1.81893  | 1.532383  |
| H  | -4.893413 | -2.834859 | 1.665229  |
| H  | -3.50097  | -1.737839 | 1.949413  |
| H  | -5.157224 | -1.12501  | 2.071765  |
| N  | -4.219864 | 0.755069  | 0.434613  |
| H  | -3.528154 | 0.503819  | 1.173198  |
| Br | -1.898612 | 0.350608  | 2.71044   |

---

**cp7-2**

---

|   |           |           |           |
|---|-----------|-----------|-----------|
| C | 2.416203  | 0.391431  | -0.913798 |
| H | 2.246268  | -0.114035 | -1.866261 |
| H | 2.565823  | 1.453309  | -1.125238 |
| C | 1.177273  | 0.178112  | -0.018096 |
| H | 1.246105  | -0.807034 | 0.455915  |
| H | 1.140477  | 0.939208  | 0.765492  |
| N | -0.05844  | 0.26309   | -0.779609 |
| H | -0.721609 | 0.982419  | -0.481019 |
| C | -0.51952  | -0.851198 | -1.424887 |
| O | -1.698307 | -0.710015 | -2.071201 |
| O | 0.071242  | -1.926401 | -1.44207  |
| C | -4.712468 | 0.318154  | -1.677543 |
| H | -5.8038   | 0.212101  | -1.709064 |
| H | -4.272942 | -0.513713 | -2.232662 |
| C | -4.30573  | 1.622098  | -2.372752 |
| H | -4.737053 | 2.477417  | -1.836105 |
| H | -4.757374 | 1.599188  | -3.369336 |
| N | -2.841068 | 1.743012  | -2.501384 |
| H | -2.598635 | 2.224397  | -3.362968 |
| H | -2.488815 | 2.307897  | -1.717196 |
| H | -1.992619 | 0.243195  | -2.221977 |
| C | 3.947078  | -1.294195 | 0.082545  |
| N | 3.498677  | -2.381762 | -0.613263 |

|    |           |           |           |
|----|-----------|-----------|-----------|
| N  | 4.73194   | -1.511496 | 1.170608  |
| C  | 2.986958  | -3.570883 | 0.060955  |
| H  | 1.934253  | -3.707412 | -0.211988 |
| H  | 3.549345  | -4.467919 | -0.227127 |
| H  | 3.058606  | -3.442738 | 1.141088  |
| C  | 3.30802   | -2.354264 | -2.061908 |
| H  | 3.716614  | -3.281555 | -2.481127 |
| H  | 2.246868  | -2.282955 | -2.321895 |
| H  | 3.861706  | -1.517472 | -2.488345 |
| C  | 5.744686  | -2.563546 | 1.183886  |
| H  | 6.73769   | -2.110559 | 1.281766  |
| H  | 5.590679  | -3.249561 | 2.025175  |
| H  | 5.710902  | -3.128419 | 0.253101  |
| C  | 4.865585  | -0.497743 | 2.225811  |
| H  | 5.123731  | -1.013175 | 3.155951  |
| H  | 5.618274  | 0.257019  | 1.968627  |
| H  | 3.912126  | 0.016633  | 2.354046  |
| N  | 3.645256  | -0.048689 | -0.259239 |
| H  | 4.370195  | 0.72812   | -0.056449 |
| Br | 5.745139  | 2.181191  | 0.088231  |
| C  | -4.585914 | -0.615038 | 0.633207  |
| N  | -4.876513 | -1.89732  | 0.280636  |
| N  | -4.648083 | -0.265675 | 1.941575  |
| C  | -5.881427 | -2.682483 | 0.992639  |
| H  | -6.546666 | -3.153073 | 0.260577  |
| H  | -5.429495 | -3.47578  | 1.600151  |
| H  | -6.475576 | -2.035156 | 1.637471  |
| C  | -4.16141  | -2.601751 | -0.787962 |
| H  | -3.824663 | -3.569442 | -0.400282 |
| H  | -4.815184 | -2.787748 | -1.648235 |
| H  | -3.285123 | -2.03841  | -1.109915 |
| C  | -4.148075 | -1.151357 | 2.994156  |
| H  | -3.348366 | -0.638903 | 3.538857  |
| H  | -4.941186 | -1.414119 | 3.702931  |
| H  | -3.737079 | -2.061725 | 2.559983  |
| C  | -4.904015 | 1.118714  | 2.362742  |
| H  | -5.442057 | 1.087286  | 3.314799  |
| H  | -3.973546 | 1.685612  | 2.464423  |
| H  | -5.525214 | 1.617132  | 1.618102  |
| N  | -4.27805  | 0.311774  | -0.273529 |

|              |           |           |           |
|--------------|-----------|-----------|-----------|
| H            | -3.640283 | 1.084682  | 0.045535  |
| Br           | -2.169007 | 2.585089  | 0.608763  |
| <hr/>        |           |           |           |
| <b>cp7-3</b> |           |           |           |
| C            | 1.573462  | 1.408786  | -1.501859 |
| H            | 1.296457  | 0.421354  | -1.883595 |
| H            | 2.392367  | 1.823325  | -2.102827 |
| C            | 0.364769  | 2.350846  | -1.60431  |
| H            | 0.633433  | 3.356343  | -1.272566 |
| H            | 0.082212  | 2.409514  | -2.66079  |
| N            | -0.790498 | 1.926641  | -0.829529 |
| H            | -1.079688 | 0.957493  | -1.005913 |
| C            | -0.85565  | 2.305348  | 0.492432  |
| O            | -1.891622 | 1.825727  | 1.180016  |
| O            | -0.018438 | 3.030837  | 1.036018  |
| C            | 2.41035   | 0.070174  | 0.404364  |
| N            | 3.23104   | -0.726151 | -0.329024 |
| N            | 2.09714   | -0.284386 | 1.665898  |
| C            | 3.032627  | -2.17981  | -0.356752 |
| H            | 3.085074  | -2.510524 | -1.397845 |
| H            | 3.798688  | -2.711732 | 0.21977   |
| H            | 2.028066  | -2.411808 | 0.00072   |
| C            | 4.171429  | -0.176603 | -1.2997   |
| H            | 5.116462  | -0.724733 | -1.223417 |
| H            | 3.803207  | -0.266905 | -2.328468 |
| H            | 4.362387  | 0.873777  | -1.078354 |
| C            | 2.988472  | -1.10711  | 2.478114  |
| H            | 3.050793  | -0.673186 | 3.480591  |
| H            | 2.624627  | -2.137219 | 2.566871  |
| H            | 3.987509  | -1.11803  | 2.042786  |
| C            | 0.795598  | 0.077422  | 2.254976  |
| H            | 0.015569  | -0.155342 | 1.525248  |
| H            | 0.645706  | -0.548112 | 3.136205  |
| H            | 0.746746  | 1.127971  | 2.553597  |
| N            | 1.984636  | 1.24205   | -0.095511 |
| H            | 1.550752  | 1.90715   | 0.550234  |
| Br           | -0.47074  | -1.399548 | -0.818134 |
| C            | -3.971947 | -0.546729 | -1.137175 |
| C            | -3.929586 | -1.031468 | 0.247041  |
| O            | -3.828797 | 0.389779  | -0.041258 |

|   |           |           |           |
|---|-----------|-----------|-----------|
| H | -3.082232 | -0.683988 | -1.748002 |
| H | -4.927081 | -0.468618 | -1.654617 |
| H | -2.976211 | -1.463405 | 0.551452  |
| C | -5.159698 | -1.455464 | 1.002012  |
| H | -5.295558 | -2.53966  | 0.922677  |
| H | -5.069387 | -1.205566 | 2.064277  |
| H | -6.051871 | -0.96097  | 0.607354  |
| H | -2.526445 | 1.316886  | 0.613391  |

---



---

**cp7-4**

---

|   |           |           |           |
|---|-----------|-----------|-----------|
| C | 2.837722  | 1.406649  | -1.469965 |
| H | 2.499246  | 0.498383  | -1.981904 |
| H | 3.714468  | 1.793409  | -2.005004 |
| C | 1.731409  | 2.482006  | -1.486086 |
| H | 2.126836  | 3.397979  | -1.036392 |
| H | 1.493537  | 2.700896  | -2.532848 |
| N | 0.5253    | 2.116485  | -0.784872 |
| H | -0.162505 | 1.542366  | -1.257624 |
| C | 0.477277  | 2.088941  | 0.618911  |
| O | -0.539865 | 1.562295  | 1.15103   |
| O | 1.490234  | 2.561046  | 1.234867  |
| C | 3.675146  | -0.08109  | 0.329685  |
| N | 4.536689  | -0.7871   | -0.466358 |
| N | 3.362228  | -0.594048 | 1.544301  |
| C | 4.490539  | -2.244425 | -0.545241 |
| H | 4.442726  | -2.545461 | -1.597693 |
| H | 5.375717  | -2.710982 | -0.095137 |
| H | 3.595309  | -2.611345 | -0.044486 |
| C | 5.496193  | -0.123692 | -1.341582 |
| H | 6.466522  | -0.624662 | -1.250139 |
| H | 5.191422  | -0.155794 | -2.394689 |
| H | 5.616944  | 0.915788  | -1.037175 |
| C | 4.360422  | -1.282321 | 2.361323  |
| H | 4.449443  | -0.771773 | 3.326442  |
| H | 4.075326  | -2.323881 | 2.548445  |
| H | 5.333085  | -1.261663 | 1.870957  |
| C | 2.101496  | -0.261258 | 2.226952  |
| H | 1.280105  | -0.218082 | 1.513804  |
| H | 1.899662  | -1.058632 | 2.946251  |
| H | 2.145217  | 0.702726  | 2.740449  |

|    |           |           |           |
|----|-----------|-----------|-----------|
| N  | 3.164631  | 1.075176  | -0.071329 |
| H  | 2.626314  | 1.704068  | 0.620084  |
| Br | -5.666072 | -0.149139 | 0.554201  |
| C  | -3.707879 | -0.46653  | 0.433425  |
| C  | -3.061085 | 0.304006  | -0.72117  |
| O  | -1.660926 | 0.076056  | -0.636107 |
| H  | -3.307459 | -0.139392 | 1.392222  |
| H  | -3.584697 | -1.542988 | 0.314908  |
| H  | -3.281165 | 1.373175  | -0.584232 |
| C  | -3.545597 | -0.146191 | -2.093496 |
| H  | -4.626721 | -0.019743 | -2.187668 |
| H  | -3.050708 | 0.439132  | -2.873864 |
| H  | -3.300738 | -1.20226  | -2.248835 |
| H  | -1.28983  | 0.626297  | 0.131626  |
| C  | -0.2944   | -2.22289  | -0.865221 |
| O  | -1.255407 | -2.878011 | -0.967509 |
| O  | 0.727845  | -1.656453 | -0.771276 |

---



---

**cp7-5**

---

|   |           |           |           |
|---|-----------|-----------|-----------|
| C | 2.834578  | 1.175477  | -1.547456 |
| H | 2.242568  | 0.330572  | -1.907132 |
| H | 3.685798  | 1.332698  | -2.221484 |
| C | 1.976733  | 2.44904   | -1.547954 |
| H | 2.55079   | 3.296064  | -1.164685 |
| H | 1.711092  | 2.670605  | -2.586662 |
| N | 0.763147  | 2.345709  | -0.761408 |
| H | 0.080833  | 1.656586  | -1.066974 |
| C | 0.85355   | 2.500063  | 0.60119   |
| O | -0.206579 | 2.076433  | 1.298329  |
| O | 1.833276  | 2.998509  | 1.156134  |
| C | 3.418747  | -0.421713 | 0.2473    |
| N | 3.793889  | -1.408481 | -0.609984 |
| N | 3.216463  | -0.720925 | 1.542632  |
| C | 3.077662  | -2.691164 | -0.615906 |
| H | 2.91032   | -2.979864 | -1.65767  |
| H | 3.645795  | -3.488969 | -0.123585 |
| H | 2.098117  | -2.551013 | -0.156562 |
| C | 4.756827  | -1.181027 | -1.682051 |
| H | 5.454514  | -2.024711 | -1.714808 |
| H | 4.275382  | -1.096939 | -2.663721 |

|    |           |           |           |
|----|-----------|-----------|-----------|
| H  | 5.327459  | -0.272915 | -1.484563 |
| C  | 3.896697  | -1.844231 | 2.183715  |
| H  | 4.279118  | -1.514846 | 3.154306  |
| H  | 3.21736   | -2.68872  | 2.344614  |
| H  | 4.736927  | -2.172647 | 1.572868  |
| C  | 2.27595   | 0.044155  | 2.376913  |
| H  | 1.351216  | 0.193307  | 1.822477  |
| H  | 2.060667  | -0.552402 | 3.26444   |
| H  | 2.682594  | 1.0097    | 2.691042  |
| N  | 3.306304  | 0.84281   | -0.190228 |
| H  | 3.15402   | 1.575996  | 0.503993  |
| H  | -0.75371  | 1.456584  | 0.747179  |
| Br | -5.44082  | -0.336675 | 0.390693  |
| C  | -3.483954 | -0.678173 | 0.388596  |
| C  | -2.791291 | 0.215237  | -0.643701 |
| O  | -1.372859 | 0.27997   | -0.366594 |
| H  | -3.150531 | -0.439054 | 1.397632  |
| H  | -3.353605 | -1.734946 | 0.180419  |
| H  | -3.132204 | 1.242409  | -0.471675 |
| C  | -3.07426  | -0.172129 | -2.09216  |
| H  | -4.15186  | -0.154357 | -2.276522 |
| H  | -2.595243 | 0.540375  | -2.770767 |
| H  | -2.690283 | -1.173075 | -2.294312 |
| C  | -0.54819  | -0.965342 | -0.419211 |
| O  | -1.147037 | -2.017287 | -0.60647  |
| O  | 0.652526  | -0.671594 | -0.250755 |

---

**cp7-6**

---

|   |           |           |           |
|---|-----------|-----------|-----------|
| C | 1.610945  | -1.341995 | 1.545354  |
| H | 1.033077  | -0.433995 | 1.755548  |
| H | 2.344098  | -1.51044  | 2.343195  |
| C | 0.680375  | -2.560136 | 1.491604  |
| H | 1.241058  | -3.452512 | 1.19538   |
| H | 0.290297  | -2.729301 | 2.498869  |
| N | -0.453455 | -2.407885 | 0.59667   |
| H | -1.298646 | -1.987516 | 0.979193  |
| C | -0.308672 | -2.586882 | -0.741115 |
| O | -1.372058 | -2.283356 | -1.508291 |
| O | 0.726368  | -3.012892 | -1.259886 |
| C | 2.770198  | 0.01517   | -0.189402 |

|    |           |           |           |
|----|-----------|-----------|-----------|
| N  | 3.432847  | 0.846379  | 0.656818  |
| N  | 2.691397  | 0.32775   | -1.498604 |
| C  | 3.228264  | 2.297516  | 0.598228  |
| H  | 3.059023  | 2.660071  | 1.616288  |
| H  | 4.098541  | 2.81752   | 0.18008   |
| H  | 2.319896  | 2.509753  | 0.032111  |
| C  | 4.178398  | 0.341834  | 1.803074  |
| H  | 5.110103  | 0.910245  | 1.894064  |
| H  | 3.618375  | 0.448673  | 2.740009  |
| H  | 4.428584  | -0.708478 | 1.650761  |
| C  | 3.707401  | 1.137468  | -2.162083 |
| H  | 3.95931   | 0.670747  | -3.119368 |
| H  | 3.354153  | 2.157141  | -2.354676 |
| H  | 4.609194  | 1.182031  | -1.551426 |
| C  | 1.54317   | -0.100904 | -2.313572 |
| H  | 1.635265  | -1.135003 | -2.656755 |
| H  | 0.635882  | 0.032157  | -1.718334 |
| H  | 1.486492  | 0.562883  | -3.17849  |
| N  | 2.288175  | -1.160852 | 0.244948  |
| H  | 2.001657  | -1.838153 | -0.468738 |
| H  | -2.034302 | -1.758396 | -1.019819 |
| Br | -0.223169 | 1.48968   | 0.334871  |
| C  | -3.673625 | 1.855184  | 0.389403  |
| C  | -3.376669 | 0.998903  | -0.863102 |
| O  | -3.1285   | -0.316525 | -0.286085 |
| H  | -2.909602 | 2.620442  | 0.533947  |
| H  | -4.680139 | 2.282575  | 0.39222   |
| H  | -2.428095 | 1.314917  | -1.303652 |
| C  | -4.503363 | 0.907219  | -1.873902 |
| H  | -4.681069 | 1.893518  | -2.315503 |
| H  | -4.246184 | 0.217488  | -2.682364 |
| H  | -5.431154 | 0.565657  | -1.404076 |
| C  | -3.147169 | -0.252118 | 1.068925  |
| O  | -3.580735 | 0.933737  | 1.495481  |
| O  | -2.854221 | -1.18798  | 1.774     |

---



---

**ts1-1**

---

|    |          |          |          |
|----|----------|----------|----------|
| Br | -0.29886 | -2.46611 | -0.3842  |
| C  | 1.720776 | -1.30926 | 0.956576 |
| C  | 2.742662 | -1.00602 | -0.02844 |
| O  | 3.142355 | -0.33005 | 1.202117 |



|              |          |          |          |
|--------------|----------|----------|----------|
| H            | 0.909047 | -0.62811 | 1.122407 |
| H            | 2.470043 | -0.29914 | -0.81088 |
| H            | 2.683247 | 0.716384 | 1.125949 |
| C            | -1.7545  | 0.834774 | 0.139676 |
| N            | -2.49741 | 0.53186  | -0.94959 |
| N            | -2.19253 | 0.489502 | 1.376348 |
| C            | -3.95118 | 0.414692 | -0.88156 |
| H            | -4.37906 | 0.887476 | -1.77118 |
| H            | -4.27731 | -0.63113 | -0.85456 |
| H            | -4.32818 | 0.932892 | 0.000304 |
| C            | -1.87322 | 0.102671 | -2.20821 |
| H            | -2.46681 | -0.72061 | -2.61258 |
| H            | -1.84156 | 0.913425 | -2.94464 |
| H            | -0.88335 | -0.30647 | -2.00298 |
| C            | -2.80909 | -0.82456 | 1.619653 |
| H            | -2.36932 | -1.24292 | 2.528639 |
| H            | -3.89233 | -0.74299 | 1.760976 |
| H            | -2.55419 | -1.50604 | 0.805307 |
| C            | -1.74128 | 1.215927 | 2.562972 |
| H            | -2.54001 | 1.193222 | 3.309167 |
| H            | -0.84321 | 0.766478 | 3.005246 |
| H            | -1.52577 | 2.254336 | 2.309496 |
| N            | -0.62445 | 1.538528 | 0.030328 |
| H            | 0.112725 | 1.444661 | 0.742207 |
| C            | -0.219   | 2.431193 | -1.06237 |
| H            | 0.087536 | 1.858453 | -1.94379 |
| H            | -1.07099 | 3.057383 | -1.34831 |
| C            | 0.970584 | 3.288813 | -0.59196 |
| H            | 1.293182 | 3.924118 | -1.4188  |
| H            | 0.664349 | 3.920471 | 0.248872 |
| C            | 2.138934 | 2.378761 | -0.17341 |
| O            | 1.911253 | 1.750106 | 0.961088 |
| O            | 3.113286 | 2.223792 | -0.89672 |
| H            | 1.826416 | -2.16795 | 1.602831 |
| C            | 3.690475 | -2.08091 | -0.48674 |
| H            | 3.177785 | -2.71137 | -1.21926 |
| H            | 4.576846 | -1.63973 | -0.95018 |
| H            | 4.005546 | -2.70535 | 0.354059 |
| <hr/>        |          |          |          |
| <b>ts1-2</b> |          |          |          |
| Br           | -1.57061 | -1.08823 | -1.53524 |
| C            | -3.05229 | 0.20341  | -1.20142 |
| C            | -3.16386 | 0.601997 | 0.267527 |
| O            | -1.95489 | 1.162774 | 0.789626 |

|   |          |          |          |
|---|----------|----------|----------|
| H | -3.94871 | -0.31909 | -1.53346 |
| H | -3.34245 | -0.30094 | 0.862681 |
| H | -1.36038 | 0.431911 | 1.481333 |
| C | 2.569992 | 0.009367 | 0.112406 |
| N | 3.155786 | -0.50274 | -1.00713 |
| N | 3.025673 | 1.179887 | 0.624312 |
| C | 4.574107 | -0.32236 | -1.29582 |
| H | 5.01315  | -1.29102 | -1.56002 |
| H | 4.7395   | 0.365763 | -2.13412 |
| H | 5.083823 | 0.065489 | -0.41412 |
| C | 2.362027 | -1.1722  | -2.03884 |
| H | 2.67748  | -0.79702 | -3.01816 |
| H | 2.499658 | -2.25983 | -2.02678 |
| H | 1.305205 | -0.93366 | -1.91429 |
| C | 3.265557 | 2.332887 | -0.25348 |
| H | 2.408795 | 3.010266 | -0.18159 |
| H | 4.182388 | 2.848645 | 0.047471 |
| H | 3.359826 | 2.010567 | -1.28865 |
| C | 2.714799 | 1.543847 | 2.011562 |
| H | 3.481708 | 2.242338 | 2.357354 |
| H | 1.730123 | 2.015173 | 2.079776 |
| H | 2.737285 | 0.653248 | 2.640646 |
| N | 1.595086 | -0.63757 | 0.734555 |
| H | 0.879772 | -0.10265 | 1.265558 |
| C | 1.296803 | -2.07424 | 0.720453 |
| H | 0.725339 | -2.34268 | -0.17423 |
| H | 2.236722 | -2.63592 | 0.706601 |
| C | 0.455314 | -2.43274 | 1.962458 |
| H | 0.202015 | -3.49395 | 1.923031 |
| H | 1.040527 | -2.24235 | 2.869446 |
| C | -0.84469 | -1.60851 | 2.011424 |
| O | -0.60445 | -0.31741 | 2.112082 |
| O | -1.94506 | -2.13202 | 1.926641 |
| C | -4.31778 | 1.594138 | 0.446063 |
| H | -4.11965 | 2.509885 | -0.1156  |
| H | -5.2675  | 1.163137 | 0.111618 |
| H | -4.41042 | 1.847765 | 1.505385 |
| H | -2.8219  | 1.049481 | -1.84207 |
| C | -0.97026 | 2.216627 | -0.11318 |
| O | 0.146083 | 2.122223 | 0.355565 |
| O | -1.62107 | 2.784852 | -0.95286 |

---

**ts1-3**

---

---

|    |          |          |          |
|----|----------|----------|----------|
| Br | 5.815913 | -0.07384 | -0.36212 |
| C  | 3.397042 | -0.79666 | -0.77175 |
| C  | 2.921187 | -0.07839 | 0.481058 |
| O  | 1.471798 | 0.144997 | 0.345686 |
| H  | 3.834798 | -1.77765 | -0.71628 |
| H  | 3.362131 | 0.915386 | 0.518513 |
| H  | 0.417392 | 1.281831 | 1.186509 |
| C  | -3.63394 | -0.42933 | -0.08222 |
| N  | -4.88902 | -0.33055 | -0.60964 |
| N  | -3.31591 | -1.50834 | 0.66603  |
| C  | -6.07309 | -0.8112  | 0.097423 |
| H  | -6.8337  | -0.0227  | 0.097754 |
| H  | -6.50385 | -1.70062 | -0.37782 |
| H  | -5.81854 | -1.04773 | 1.130227 |
| C  | -5.1235  | 0.222552 | -1.94331 |
| H  | -5.69618 | -0.49962 | -2.53617 |
| H  | -5.6925  | 1.158328 | -1.90058 |
| H  | -4.17326 | 0.402892 | -2.44441 |
| C  | -3.80013 | -2.84936 | 0.331652 |
| H  | -2.93797 | -3.5007  | 0.156638 |
| H  | -4.39674 | -3.26989 | 1.148176 |
| H  | -4.39918 | -2.8227  | -0.57709 |
| C  | -2.23057 | -1.47664 | 1.656022 |
| H  | -2.54555 | -2.06328 | 2.524298 |
| H  | -1.3142  | -1.89279 | 1.231435 |
| H  | -2.02783 | -0.45059 | 1.959867 |
| N  | -2.72367 | 0.521676 | -0.28778 |
| H  | -1.72705 | 0.203418 | -0.29836 |
| C  | -3.00006 | 1.949469 | -0.47062 |
| H  | -2.6178  | 2.269902 | -1.44541 |
| H  | -4.07927 | 2.107703 | -0.45531 |
| C  | -2.34084 | 2.808377 | 0.629271 |
| H  | -2.54978 | 3.858923 | 0.411703 |
| H  | -2.74973 | 2.549883 | 1.609324 |
| C  | -0.83734 | 2.589636 | 0.592877 |
| O  | -0.46196 | 1.641477 | 1.467496 |
| O  | -0.10333 | 3.133242 | -0.20152 |
| C  | 3.184372 | -0.85172 | 1.763515 |
| H  | 2.722173 | -1.84377 | 1.715818 |
| H  | 4.264568 | -0.96143 | 1.878259 |
| H  | 2.779858 | -0.31643 | 2.627432 |
| H  | 3.512283 | -0.25112 | -1.69388 |
| C  | 0.882474 | -0.71639 | -0.55292 |
| O  | -0.35509 | -0.70443 | -0.65771 |

|              |          |          |          |
|--------------|----------|----------|----------|
| O            | 1.703517 | -1.45085 | -1.18429 |
| <hr/>        |          |          |          |
| <b>ts2-1</b> |          |          |          |
| Br           | -0.41104 | -2.20119 | -0.26484 |
| C            | -2.16463 | -0.53488 | -0.87611 |
| C            | -2.8192  | -0.04535 | 0.340002 |
| O            | -3.34938 | 0.921456 | -0.52253 |
| H            | -1.3744  | 0.045521 | -1.31359 |
| H            | -2.11854 | 0.339797 | 1.100318 |
| H            | -2.29291 | 1.998844 | -0.72231 |
| C            | 1.681485 | 0.633032 | 0.09936  |
| N            | 2.110485 | 0.178607 | 1.302815 |
| N            | 2.374757 | 0.305222 | -1.02165 |
| C            | 3.525701 | -0.06826 | 1.565607 |
| H            | 3.777478 | 0.345027 | 2.54782  |
| H            | 3.763768 | -1.13831 | 1.57117  |
| H            | 4.137264 | 0.428173 | 0.812296 |
| C            | 1.167267 | -0.25929 | 2.339267 |
| H            | 1.615325 | -1.11082 | 2.857535 |
| H            | 0.962898 | 0.526937 | 3.074552 |
| H            | 0.25302  | -0.6214  | 1.864935 |
| C            | 2.837313 | -1.07416 | -1.23256 |
| H            | 2.35384  | -1.47305 | -2.12863 |
| H            | 3.92519  | -1.10638 | -1.35652 |
| H            | 2.516482 | -1.7057  | -0.40708 |
| C            | 2.246061 | 1.104971 | -2.23823 |
| H            | 3.16031  | 0.989052 | -2.82626 |
| H            | 1.397797 | 0.77998  | -2.85472 |
| H            | 2.122081 | 2.158929 | -1.98603 |
| N            | 0.65286  | 1.471808 | -0.00421 |
| H            | 0.123036 | 1.526972 | -0.87931 |
| C            | -0.02213 | 2.271891 | 1.014554 |
| H            | -0.59769 | 1.630626 | 1.688332 |
| H            | 0.708083 | 2.830143 | 1.6103   |
| C            | -0.9792  | 3.223804 | 0.23619  |
| H            | -1.77247 | 3.550706 | 0.922284 |
| H            | -0.41688 | 4.115802 | -0.07018 |
| H            | -2.73069 | -1.17767 | -1.53707 |
| C            | -3.83875 | -0.96195 | 0.99344  |
| H            | -3.3367  | -1.81375 | 1.463155 |
| H            | -4.40998 | -0.41734 | 1.752099 |
| H            | -4.5414  | -1.33376 | 0.241238 |
| O            | -1.47671 | 2.60917  | -0.92032 |

| <b>ts2-2</b> |          |          |          |
|--------------|----------|----------|----------|
| C            | 2.404383 | -0.41779 | 0.26481  |
| N            | 2.211708 | -1.66524 | -0.24431 |
| N            | 3.492792 | 0.298171 | -0.14653 |
| C            | 3.31543  | -2.57567 | -0.52351 |
| H            | 3.13189  | -3.53177 | -0.01942 |
| H            | 3.421139 | -2.77428 | -1.59743 |
| H            | 4.248964 | -2.15729 | -0.14712 |
| C            | 0.863215 | -2.15881 | -0.53029 |
| H            | 0.874019 | -2.64417 | -1.51229 |
| H            | 0.525542 | -2.89043 | 0.212209 |
| H            | 0.152829 | -1.33382 | -0.56211 |
| C            | 3.885606 | 0.31708  | -1.55764 |
| H            | 3.609792 | 1.279138 | -2.00331 |
| H            | 4.966409 | 0.172047 | -1.6557  |
| H            | 3.36774  | -0.46739 | -2.10531 |
| C            | 3.920116 | 1.472923 | 0.611769 |
| H            | 4.981734 | 1.645534 | 0.413796 |
| H            | 3.358068 | 2.369551 | 0.322155 |
| H            | 3.781371 | 1.297983 | 1.678999 |
| N            | 1.597565 | 0.1061   | 1.166112 |
| H            | 1.402232 | 1.130333 | 1.19743  |
| C            | 0.623306 | -0.51906 | 2.063695 |
| H            | -0.21135 | -0.94433 | 1.50402  |
| H            | 1.100995 | -1.29935 | 2.666528 |
| C            | 0.098848 | 0.684511 | 2.909365 |
| H            | -0.86789 | 0.384124 | 3.347023 |
| H            | 0.791071 | 0.86399  | 3.749304 |
| O            | 0.023746 | 1.817409 | 2.104692 |
| Br           | -2.70508 | -1.77323 | -0.12465 |
| C            | -3.22804 | 0.094261 | -0.6088  |
| C            | -2.56601 | 1.118753 | 0.310447 |
| O            | -1.1873  | 1.126587 | 0.130749 |
| H            | -4.316   | 0.091507 | -0.54031 |
| H            | -2.82655 | 0.83441  | 1.348193 |
| H            | -0.62142 | 1.542118 | 1.149864 |
| C            | -3.1997  | 2.50223  | 0.046206 |
| H            | -3.02984 | 2.816846 | -0.98752 |
| H            | -4.27785 | 2.511102 | 0.247082 |
| H            | -2.72241 | 3.231852 | 0.707008 |
| H            | -2.90351 | 0.213599 | -1.64143 |
| C            | -0.13329 | 1.877224 | -1.85067 |

|              |          |          |          |
|--------------|----------|----------|----------|
| O            | 0.954907 | 1.831216 | -1.4025  |
| O            | -1.07596 | 1.99661  | -2.53895 |
| <hr/>        |          |          |          |
| <b>ts2-3</b> |          |          |          |
| C            | -3.52856 | 0.013941 | 0.241596 |
| N            | -4.59537 | -0.77916 | 0.554137 |
| N            | -3.74902 | 1.212678 | -0.34285 |
| C            | -5.78423 | -0.85511 | -0.2909  |
| H            | -5.99109 | -1.90491 | -0.52768 |
| H            | -6.66698 | -0.43662 | 0.206859 |
| H            | -5.61326 | -0.31928 | -1.2239  |
| C            | -4.59121 | -1.65009 | 1.725552 |
| H            | -5.52767 | -1.51109 | 2.277101 |
| H            | -4.51336 | -2.70875 | 1.44897  |
| H            | -3.75947 | -1.38662 | 2.378279 |
| C            | -4.88791 | 2.058376 | 0.013808 |
| H            | -5.45472 | 1.608791 | 0.828275 |
| H            | -4.51496 | 3.032082 | 0.348141 |
| H            | -5.55108 | 2.218146 | -0.84344 |
| C            | -2.71976 | 1.851155 | -1.17974 |
| H            | -3.22925 | 2.395357 | -1.98024 |
| H            | -2.10374 | 2.540771 | -0.59593 |
| H            | -2.07644 | 1.083481 | -1.61249 |
| N            | -2.28316 | -0.36297 | 0.52375  |
| H            | -1.54631 | 0.386853 | 0.580281 |
| C            | -1.72218 | -1.70639 | 0.346691 |
| H            | -0.78439 | -1.70848 | 0.907623 |
| H            | -2.36521 | -2.48071 | 0.772219 |
| C            | -1.4409  | -2.01487 | -1.13581 |
| H            | -0.86477 | -2.95343 | -1.1802  |
| H            | -2.3862  | -2.19138 | -1.66375 |
| O            | -0.79816 | -0.95695 | -1.80972 |
| Br           | 5.532615 | -0.45186 | 0.280463 |
| C            | 3.357689 | 0.862742 | 0.566414 |
| C            | 2.603066 | -0.11076 | -0.32395 |
| O            | 1.170154 | -0.00196 | 0.005364 |
| H            | 3.944751 | 1.659801 | 0.144918 |
| H            | 2.879321 | -1.13004 | -0.06181 |
| H            | -0.02933 | -0.67117 | -1.27801 |
| C            | 2.798167 | 0.150973 | -1.80903 |
| H            | 2.51627  | 1.179465 | -2.05835 |
| H            | 3.853338 | -0.00106 | -2.04495 |

|   |          |          |          |
|---|----------|----------|----------|
| H | 2.190532 | -0.53459 | -2.40725 |
| H | 3.498542 | 0.640995 | 1.611568 |
| C | 0.85925  | 1.216418 | 0.579657 |
| O | -0.33871 | 1.465345 | 0.794267 |
| O | 1.86502  | 1.945479 | 0.83591  |

---

| <b>ts3-1</b> |          |          |          |
|--------------|----------|----------|----------|
| C            | -1.22502 | 1.01912  | -0.14021 |
| N            | -1.95724 | 1.947437 | 0.546554 |
| N            | -0.12485 | 1.439832 | -0.8131  |
| C            | -2.12424 | 3.316646 | 0.070522 |
| H            | -3.18712 | 3.581185 | 0.105142 |
| H            | -1.57096 | 4.036255 | 0.685834 |
| H            | -1.78013 | 3.396132 | -0.96018 |
| C            | -2.56551 | 1.647383 | 1.840336 |
| H            | -2.28852 | 2.430255 | 2.555376 |
| I            | -3.65943 | 1.607479 | 1.780001 |
| H            | -2.19216 | 0.69513  | 2.2143   |
| C            | 0.790801 | 2.453045 | -0.26742 |
| H            | 1.791623 | 2.004481 | -0.20241 |
| H            | 0.822566 | 3.341367 | -0.90911 |
| H            | 0.470658 | 2.742978 | 0.732721 |
| C            | 0.295448 | 0.878081 | -2.10291 |
| H            | 0.190758 | 1.648949 | -2.87729 |
| H            | 1.34808  | 0.579389 | -2.05428 |
| H            | -0.32584 | 0.021535 | -2.35954 |
| N            | -1.57795 | -0.26664 | -0.14617 |
| H            | -0.83878 | -1.06028 | -0.01986 |
| C            | -2.95301 | -0.75327 | -0.00583 |
| H            | -3.13977 | -1.08276 | 1.025164 |
| H            | -3.64901 | 0.065063 | -0.21898 |
| C            | -3.19731 | -1.93149 | -0.95595 |
| H            | -3.04438 | -1.59359 | -1.98828 |
| I            | -2.43828 | -2.69595 | -0.7566  |
| Br           | 3.647906 | -0.10239 | -0.2036  |
| C            | 1.124228 | -2.03004 | 1.139773 |
| C            | 1.557029 | -1.62557 | -0.19284 |
| O            | -0.03363 | -2.31641 | 0.367786 |
| H            | 1.606073 | -2.94507 | 1.50709  |
| H            | 1.980441 | -2.34509 | -0.87682 |
| H            | 1.192213 | -0.70103 | -0.57787 |
| C            | 1.028057 | -0.99307 | 2.241345 |

|   |          |          |          |
|---|----------|----------|----------|
| H | 0.449636 | -1.37801 | 3.088218 |
| H | 2.034656 | -0.73027 | 2.578082 |
| H | 0.554656 | -0.07411 | 1.881973 |
| C | -4.60084 | -2.52118 | -0.79576 |
| H | -4.74996 | -3.36188 | -1.47922 |
| H | -4.7639  | -2.8909  | 0.222644 |
| H | -5.37833 | -1.77857 | -1.00962 |

---



---

|              |          |          |          |
|--------------|----------|----------|----------|
| <b>ts3-2</b> |          |          |          |
| C            | -1.94777 | -1.05538 | 0.218081 |
| N            | -2.71858 | -1.9565  | -0.48225 |
| N            | -1.59003 | -1.391   | 1.487968 |
| C            | -3.79446 | -2.71259 | 0.145937 |
| H            | -4.72441 | -2.56323 | -0.41636 |
| H            | -3.58243 | -3.78948 | 0.170587 |
| H            | -3.94842 | -2.36062 | 1.165795 |
| C            | -2.5109  | -2.20745 | -1.9027  |
| H            | -2.37588 | -3.28396 | -2.06717 |
| H            | -3.36332 | -1.87665 | -2.50936 |
| H            | -1.61367 | -1.69131 | -2.24321 |
| C            | -1.24661 | -2.76224 | 1.85627  |
| H            | -0.21049 | -2.79363 | 2.21247  |
| H            | -1.89506 | -3.13279 | 2.658692 |
| H            | -1.33371 | -3.42246 | 0.994466 |
| C            | -1.21704 | -0.37521 | 2.47744  |
| H            | -1.60593 | -0.68781 | 3.452244 |
| H            | -0.13163 | -0.25608 | 2.531478 |
| H            | -1.63094 | 0.593654 | 2.204999 |
| N            | -1.55074 | 0.092593 | -0.29561 |
| H            | -0.56527 | 0.556822 | 0.065749 |
| C            | -2.28641 | 0.861931 | -1.30128 |
| H            | -1.57698 | 1.159124 | -2.0826  |
| H            | -3.05548 | 0.247412 | -1.77676 |
| C            | -2.9345  | 2.113121 | -0.68998 |
| H            | -3.68369 | 1.794948 | 0.046545 |
| H            | -2.17693 | 2.67227  | -0.13337 |
| Br           | 4.148488 | -0.94982 | -0.50996 |
| C            | 1.819107 | 0.86104  | -0.26039 |
| C            | 2.375864 | -0.46684 | 0.263232 |
| N            | 0.638651 | 1.096764 | 0.465293 |
| H            | 2.539377 | 1.653288 | -0.0152  |
| H            | 2.539412 | -0.4154  | 1.338348 |



|   |          |          |          |
|---|----------|----------|----------|
| H | 1.722551 | -1.30666 | 0.019122 |
| C | 1.586032 | 0.86252  | -1.77451 |
| H | 1.160774 | 1.82442  | -2.07613 |
| H | 2.519112 | 0.706287 | -2.32266 |
| H | 0.88593  | 0.068193 | -2.06399 |
| C | 0.504187 | 2.775258 | 1.369505 |
| O | 1.572146 | 3.293574 | 1.269628 |
| O | -0.63037 | 2.77159  | 1.757588 |
| C | -3.58842 | 2.997031 | -1.75554 |
| H | -4.05683 | 3.874188 | -1.29984 |
| H | -2.85072 | 3.357185 | -2.48128 |
| H | -4.36494 | 2.457748 | -2.31138 |

---



---

**ts3-3**

---

|    |          |          |          |
|----|----------|----------|----------|
| C  | -2.84305 | -0.43879 | -0.31907 |
| N  | -3.9186  | -0.22553 | -1.13396 |
| N  | -2.80095 | -1.56745 | 0.422624 |
| C  | -5.28026 | -0.56542 | -0.72682 |
| H  | -5.92476 | 0.309282 | -0.86736 |
| H  | -5.69148 | -1.39245 | -1.31769 |
| H  | -5.29716 | -0.83762 | 0.328006 |
| C  | -3.77947 | 0.387113 | -2.45387 |
| H  | -4.34891 | -0.20415 | -3.1791  |
| H  | -4.15769 | 1.415519 | -2.4743  |
| H  | -2.73304 | 0.384692 | -2.75694 |
| C  | -3.37118 | -2.82531 | -0.06149 |
| H  | -2.60361 | -3.60341 | -0.00169 |
| H  | -4.22511 | -3.13907 | 0.549121 |
| H  | -3.68636 | -2.72966 | -1.09962 |
| C  | -2.02729 | -1.68158 | 1.666539 |
| H  | -2.66252 | -2.1562  | 2.421665 |
| H  | -1.14288 | -2.30616 | 1.50703  |
| H  | -1.68786 | -0.70895 | 2.027378 |
| N  | -1.85843 | 0.457283 | -0.26214 |
| H  | -0.94132 | 0.1585   | 0.10924  |
| C  | -2.02848 | 1.905507 | -0.48247 |
| H  | -1.85515 | 2.151491 | -1.53764 |
| H  | -3.06901 | 2.162615 | -0.2555  |
| C  | -1.07324 | 2.722106 | 0.391552 |
| H  | -1.18311 | 2.419948 | 1.436929 |
| H  | -0.04296 | 2.476354 | 0.1123   |
| Br | 4.586585 | -0.15752 | -1.26691 |

|   |          |          |          |
|---|----------|----------|----------|
| C | 1.942133 | -0.61832 | 0.08635  |
| C | 3.106564 | 0.102575 | 0.745321 |
| N | 0.707105 | -0.17477 | 0.724472 |
| H | 1.866619 | -0.29732 | -0.95162 |
| H | 3.236569 | 1.163016 | 0.60707  |
| H | 3.885542 | -0.43573 | 1.254798 |
| C | 2.060691 | -2.13318 | 0.177492 |
| H | 1.193222 | -2.61754 | -0.28222 |
| H | 2.96464  | -2.44236 | -0.35194 |
| H | 2.128359 | -2.44789 | 1.224056 |
| C | 0.903356 | 0.271174 | 2.052066 |
| O | 2.130577 | 0.326827 | 2.37426  |
| O | -0.10916 | 0.547105 | 2.690768 |
| C | -1.31314 | 4.224455 | 0.222607 |
| H | -0.60976 | 4.794647 | 0.834944 |
| H | -1.17897 | 4.542384 | -0.81774 |
| H | -2.32591 | 4.507759 | 0.531597 |

---



---

**ts4-1**

---

|   |          |          |          |
|---|----------|----------|----------|
| C | 1.625695 | -0.57036 | -0.19249 |
| N | 2.557595 | -1.24237 | 0.548879 |
| N | 0.61859  | -1.28261 | -0.75596 |
| C | 2.994836 | -2.59386 | 0.214417 |
| H | 4.090191 | -2.62767 | 0.216947 |
| H | 2.62684  | -3.33474 | 0.934283 |
| H | 2.641434 | -2.86329 | -0.78026 |
| C | 3.122662 | -0.67667 | 1.771576 |
| H | 3.043562 | -1.41583 | 2.576642 |
| H | 4.179265 | -0.41035 | 1.651104 |
| H | 2.560069 | 0.208592 | 2.064185 |
| C | -0.04624 | -2.39244 | -0.0562  |
| H | -1.11484 | -2.14927 | 0.024115 |
| H | 0.08159  | -3.33416 | -0.60253 |
| H | 0.364967 | -2.49959 | 0.94687  |
| C | 0.0414   | -0.96576 | -2.06824 |
| H | 0.273411 | -1.78187 | -2.76456 |
| H | -1.04761 | -0.88276 | -1.98585 |
| H | 0.460501 | -0.03566 | -2.44893 |
| N | 1.700983 | 0.751048 | -0.35559 |
| H | 0.816318 | 1.385217 | -0.27264 |
| C | 2.948999 | 1.52152  | -0.33435 |
| H | 3.112405 | 1.959758 | 0.658486 |

|    |          |          |          |
|----|----------|----------|----------|
| H  | 3.786991 | 0.846936 | -0.53665 |
| C  | 2.884593 | 2.6424   | -1.37231 |
| H  | 2.797954 | 2.236746 | -2.38479 |
| H  | 2.019241 | 3.282251 | -1.18001 |
| Br | -3.36429 | -0.50174 | -0.04421 |
| C  | -1.25812 | 2.06109  | 0.903575 |
| C  | -1.65126 | 1.414146 | -0.34305 |
| O  | -0.22301 | 2.485529 | 0.02826  |
| H  | -1.90955 | 2.893392 | 1.199144 |
| H  | -2.24846 | 1.939822 | -1.07236 |
| H  | -1.11157 | 0.546494 | -0.64668 |
| C  | -0.89398 | 1.210726 | 2.104883 |
| H  | -0.37905 | 1.810352 | 2.863325 |
| H  | -1.80468 | 0.784726 | 2.534921 |
| H  | -0.24656 | 0.375621 | 1.819751 |
| H  | 3.790167 | 3.254706 | -1.32148 |

---



---

**ts4-2**

---

|   |          |          |          |
|---|----------|----------|----------|
| C | -2.23326 | -0.58628 | 0.126825 |
| N | -3.07797 | -1.50635 | -0.45334 |
| N | -2.00694 | -0.6986  | 1.464375 |
| C | -4.28452 | -1.98214 | 0.211474 |
| H | -5.14771 | -1.84154 | -0.45063 |
| H | -4.22291 | -3.04833 | 0.465822 |
| H | -4.45427 | -1.41153 | 1.124291 |
| C | -2.82065 | -2.06217 | -1.77577 |
| H | -2.83355 | -3.15793 | -1.71959 |
| H | -3.57656 | -1.75212 | -2.50826 |
| H | -1.83835 | -1.74668 | -2.12671 |
| C | -1.88104 | -1.99818 | 2.119448 |
| H | -0.8841  | -2.08372 | 2.566833 |
| H | -2.6244  | -2.11569 | 2.916512 |
| H | -2.00314 | -2.80369 | 1.396593 |
| C | -1.55641 | 0.442737 | 2.267447 |
| H | -2.04119 | 0.383969 | 3.247567 |
| H | -0.46997 | 0.435929 | 2.388976 |
| H | -1.81672 | 1.379737 | 1.779068 |
| N | -1.64805 | 0.374993 | -0.56064 |
| H | -0.62974 | 0.772902 | -0.21079 |
| C | -2.20763 | 1.011502 | -1.7565  |
| H | -1.42385 | 1.03371  | -2.52155 |
| H | -3.0355  | 0.420211 | -2.15404 |

|    |          |          |          |
|----|----------|----------|----------|
| C  | -2.68422 | 2.435648 | -1.45478 |
| H  | -3.53631 | 2.420695 | -0.76739 |
| H  | -1.89084 | 3.023497 | -0.98891 |
| Br | 3.851183 | -1.40731 | -0.1086  |
| C  | 1.788095 | 0.695653 | -0.38549 |
| C  | 2.116935 | -0.57192 | 0.409438 |
| O  | 0.614349 | 1.217602 | 0.186003 |
| H  | 2.600035 | 1.418223 | -0.22675 |
| H  | 2.215868 | -0.34365 | 1.469334 |
| H  | 1.370767 | -1.35439 | 0.258102 |
| C  | 1.64633  | 0.442406 | -1.88973 |
| H  | 1.387487 | 1.37786  | -2.39462 |
| H  | 2.576587 | 0.060037 | -2.3184  |
| H  | 0.854537 | -0.29075 | -2.09108 |
| C  | 0.664981 | 3.049734 | 0.717832 |
| O  | 1.799447 | 3.397627 | 0.610659 |
| O  | -0.47983 | 3.272206 | 0.997513 |
| H  | -3.00034 | 2.92725  | -2.38094 |

---

**ts4-3**

---

|   |          |          |          |
|---|----------|----------|----------|
| C | 2.89205  | -0.28233 | -0.17936 |
| N | 3.949415 | -1.14033 | -0.07318 |
| N | 2.890499 | 0.632312 | -1.17402 |
| C | 5.325058 | -0.71309 | -0.31935 |
| H | 5.946758 | -0.99537 | 0.537468 |
| H | 5.745709 | -1.18149 | -1.21699 |
| H | 5.365445 | 0.370041 | -0.43027 |
| C | 3.7747   | -2.5368  | 0.322416 |
| H | 4.351832 | -3.17098 | -0.35906 |
| H | 4.122562 | -2.72363 | 1.344767 |
| H | 2.724933 | -2.81729 | 0.243656 |
| C | 3.479139 | 0.343917 | -2.48251 |
| H | 2.728612 | 0.539685 | -3.25493 |
| H | 4.34841  | 0.981004 | -2.67974 |
| H | 3.776796 | -0.70179 | -2.54694 |
| C | 2.141782 | 1.894646 | -1.10017 |
| H | 2.802413 | 2.703231 | -1.42992 |
| H | 1.270143 | 1.858369 | -1.76063 |
| H | 1.783401 | 2.097584 | -0.08955 |
| N | 1.884303 | -0.35089 | 0.689805 |
| H | 0.980458 | 0.077343 | 0.427009 |
| C | 2.014684 | -0.79289 | 2.091935 |

|    |          |          |          |
|----|----------|----------|----------|
| H  | 1.854796 | -1.87506 | 2.162947 |
| H  | 3.042671 | -0.59332 | 2.41163  |
| C  | 1.016923 | -0.06744 | 2.990849 |
| H  | 1.104243 | 1.016472 | 2.894463 |
| H  | -0.00897 | -0.34298 | 2.733162 |
| Br | -4.47068 | -1.26167 | -0.31876 |
| C  | -1.85023 | 0.200945 | -0.46694 |
| C  | -3.03711 | 0.693235 | 0.344383 |
| O  | -0.63417 | 0.759606 | 0.113683 |
| H  | -1.76153 | -0.87797 | -0.3492  |
| H  | -3.1808  | 0.355418 | 1.357274 |
| H  | -3.81827 | 1.281541 | -0.1027  |
| C  | -1.94735 | 0.580314 | -1.93796 |
| H  | -1.06523 | 0.234641 | -2.4863  |
| H  | -2.83763 | 0.108398 | -2.35954 |
| H  | -2.02815 | 1.666847 | -2.04622 |
| C  | -0.86041 | 1.977615 | 0.796595 |
| O  | -2.0941  | 2.26589  | 0.887202 |
| O  | 0.136545 | 2.565733 | 1.207704 |
| H  | 1.194047 | -0.35873 | 4.030014 |

---



---

**ts5-1**

---

|   |          |          |          |
|---|----------|----------|----------|
| C | -1.23989 | 1.007921 | -0.13667 |
| N | -1.98005 | 1.927584 | 0.551215 |
| N | -0.14155 | 1.438947 | -0.80587 |
| C | -2.16222 | 3.295223 | 0.075729 |
| H | -3.22916 | 3.543892 | 0.100222 |
| H | -1.62544 | 4.021007 | 0.698214 |
| H | -1.80914 | 3.381781 | -0.9513  |
| C | -2.6011  | 1.615782 | 1.83632  |
| H | -2.34296 | 2.400661 | 2.556056 |
| H | -3.69332 | 1.561187 | 1.761554 |
| H | -2.21969 | 0.667722 | 2.212825 |
| C | 0.763009 | 2.460497 | -0.25728 |
| H | 1.768121 | 2.021748 | -0.19235 |
| H | 0.786578 | 3.350297 | -0.89726 |
| H | 0.438504 | 2.745343 | 0.742909 |
| C | 0.286377 | 0.884312 | -2.09622 |
| H | 0.177763 | 1.656679 | -2.86854 |
| H | 1.341115 | 0.593232 | -2.0456  |
| H | -0.32806 | 0.024151 | -2.35713 |
| N | -1.58046 | -0.28202 | -0.14519 |

|    |          |          |          |
|----|----------|----------|----------|
| H  | -0.83444 | -1.06618 | -0.0155  |
| C  | -2.94952 | -0.77954 | -0.00871 |
| H  | -3.12746 | -1.14292 | 1.012657 |
| H  | -3.66633 | 0.021744 | -0.20354 |
| C  | -3.18972 | -1.93352 | -0.99011 |
| H  | -3.1143  | -1.54669 | -2.01266 |
| H  | -2.38654 | -2.67537 | -0.86231 |
| N  | -4.54641 | -2.45284 | -0.79094 |
| H  | -4.79641 | -3.0638  | -1.5638  |
| H  | -4.57062 | -3.03644 | 0.042868 |
| Br | 3.640941 | -0.07619 | -0.20563 |
| C  | 1.137482 | -2.02622 | 1.143956 |
| C  | 1.561267 | -1.61553 | -0.18945 |
| O  | -0.02019 | -2.32232 | 0.374991 |
| H  | 1.629606 | -2.937   | 1.508303 |
| H  | 1.989267 | -2.32956 | -0.87627 |
| H  | 1.187934 | -0.69281 | -0.57088 |
| C  | 1.034396 | -0.9916  | 2.247064 |
| H  | 0.465498 | -1.3842  | 3.096855 |
| H  | 2.039533 | -0.71652 | 2.578355 |
| H  | 0.547207 | -0.07848 | 1.891125 |

---



---

**ts5-2**

---

|   |          |          |          |
|---|----------|----------|----------|
| C | -2.32702 | -0.85165 | 0.10219  |
| N | -3.39867 | -1.35608 | -0.60118 |
| N | -2.02649 | -1.45634 | 1.286375 |
| C | -4.62561 | -1.78547 | 0.058821 |
| H | -5.48151 | -1.25429 | -0.37543 |
| H | -4.79992 | -2.86308 | -0.05773 |
| H | -4.57661 | -1.5497  | 1.121654 |
| C | -3.39896 | -1.44132 | -2.05513 |
| H | -3.7261  | -2.44435 | -2.35544 |
| H | -4.0768  | -0.71121 | -2.51569 |
| H | -2.39048 | -1.28165 | -2.43634 |
| C | -2.12634 | -2.90328 | 1.458344 |
| H | -1.13619 | -3.31203 | 1.691894 |
| H | -2.80457 | -3.1604  | 2.280384 |
| H | -2.48402 | -3.37191 | 0.542435 |
| C | -1.26656 | -0.76101 | 2.329498 |
| H | -1.62919 | -1.10674 | 3.302926 |
| H | -0.19412 | -0.9564  | 2.240173 |
| H | -1.40313 | 0.315699 | 2.243598 |

|    |          |          |          |
|----|----------|----------|----------|
| N  | -1.60028 | 0.163761 | -0.32026 |
| H  | -0.48818 | 0.290974 | 0.029527 |
| C  | -2.10486 | 1.261607 | -1.14629 |
| H  | -1.2193  | 1.769896 | -1.54265 |
| H  | -2.68981 | 0.927721 | -2.00553 |
| C  | -2.94601 | 2.26187  | -0.33904 |
| H  | -3.83208 | 1.742558 | 0.047825 |
| H  | -2.35685 | 2.599161 | 0.524851 |
| N  | -3.40406 | 3.331537 | -1.23405 |
| H  | -4.07714 | 3.917816 | -0.74657 |
| H  | -2.62043 | 3.943238 | -1.45589 |
| Br | 4.669521 | -0.66338 | -0.4593  |
| C  | 1.848637 | 0.187629 | -0.43234 |
| C  | 2.967484 | -0.28356 | 0.502134 |
| O  | 0.767238 | 0.522777 | 0.407122 |
| H  | 2.216777 | 1.081824 | -0.95794 |
| H  | 3.215375 | 0.496279 | 1.218006 |
| H  | 2.705793 | -1.21126 | 1.012693 |
| C  | 1.45733  | -0.87526 | -1.46238 |
| H  | 0.681215 | -0.49468 | -2.13396 |
| H  | 2.321687 | -1.16925 | -2.06349 |
| H  | 1.06771  | -1.76857 | -0.95912 |
| C  | 0.834319 | 2.311026 | 1.194038 |
| O  | 1.877097 | 2.769313 | 0.849349 |
| O  | -0.20975 | 2.368504 | 1.774793 |

---

**ts5-3**

---

|   |          |          |          |
|---|----------|----------|----------|
| C | -2.7442  | -0.57246 | -0.38169 |
| N | -3.78875 | -0.33537 | -1.22767 |
| N | -2.8197  | -1.61812 | 0.471837 |
| C | -5.17844 | -0.48401 | -0.80067 |
| H | -5.71714 | 0.448569 | -1.0026  |
| H | -5.68511 | -1.29604 | -1.3353  |
| H | -5.22207 | -0.68017 | 0.270116 |
| C | -3.59371 | 0.157503 | -2.5891  |
| H | -4.20865 | -0.44062 | -3.27054 |
| H | -3.88933 | 1.208134 | -2.69218 |
| H | -2.54934 | 0.046509 | -2.879   |
| C | -3.51554 | -2.8553  | 0.115353 |
| H | -2.82696 | -3.69604 | 0.247691 |
| H | -4.38817 | -3.02219 | 0.756295 |
| H | -3.83331 | -2.82906 | -0.92608 |

|    |          |          |          |
|----|----------|----------|----------|
| C  | -2.03555 | -1.68549 | 1.713873 |
| H  | -2.68722 | -2.06438 | 2.507422 |
| H  | -1.18975 | -2.37109 | 1.595874 |
| H  | -1.64252 | -0.70611 | 1.997088 |
| N  | -1.65421 | 0.195734 | -0.40999 |
| H  | -0.80047 | -0.16462 | 0.039471 |
| C  | -1.62441 | 1.646691 | -0.65871 |
| H  | -0.56529 | 1.904317 | -0.73979 |
| H  | -2.08842 | 1.905064 | -1.61094 |
| C  | -2.27678 | 2.464075 | 0.466024 |
| H  | -3.33607 | 2.18444  | 0.535636 |
| H  | -1.79336 | 2.199563 | 1.41554  |
| N  | -2.20691 | 3.883284 | 0.100724 |
| H  | -2.79689 | 4.425279 | 0.726736 |
| H  | -1.25993 | 4.224438 | 0.255793 |
| Br | 4.688482 | -0.09088 | -1.25317 |
| C  | 2.159315 | -0.67126 | 0.271431 |
| C  | 3.123044 | 0.44033  | 0.652079 |
| O  | 0.835509 | -0.31749 | 0.779205 |
| H  | 2.057572 | -0.70152 | -0.81216 |
| H  | 3.041241 | 1.411002 | 0.191883 |
| H  | 3.984912 | 0.250554 | 1.266635 |
| C  | 2.578471 | -2.02862 | 0.815811 |
| H  | 1.843049 | -2.79468 | 0.55201  |
| H  | 3.543903 | -2.29178 | 0.377821 |
| H  | 2.672648 | -1.99057 | 1.905799 |
| C  | 0.892464 | 0.542231 | 1.892378 |
| O  | 2.0715   | 0.93559  | 2.156893 |
| O  | -0.17966 | 0.809509 | 2.434252 |

---



---

**ts6-1**

|   |          |          |          |
|---|----------|----------|----------|
| C | 1.656129 | -0.76719 | 0.110776 |
| N | 1.83422  | -2.06857 | -0.27171 |
| N | 2.739879 | -0.0421  | 0.486824 |
| C | 2.844417 | -2.92827 | 0.335942 |
| H | 2.380463 | -3.8753  | 0.634216 |
| H | 3.664226 | -3.15486 | -0.3571  |
| H | 3.254816 | -2.44675 | 1.223277 |
| C | 1.049011 | -2.66324 | -1.35269 |
| H | 1.72717  | -3.18324 | -2.03827 |
| H | 0.312778 | -3.38569 | -0.98219 |
| H | 0.533198 | -1.88338 | -1.91128 |



|    |          |          |          |
|----|----------|----------|----------|
| C  | 4.002912 | -0.12048 | -0.24774 |
| H  | 4.211778 | 0.850672 | -0.70941 |
| H  | 4.832024 | -0.37514 | 0.421578 |
| H  | 3.937688 | -0.86752 | -1.03752 |
| C  | 2.599776 | 1.131071 | 1.363224 |
| H  | 3.552382 | 1.276287 | 1.880517 |
| H  | 2.317082 | 2.028165 | 0.800833 |
| H  | 1.818662 | 0.939666 | 2.100155 |
| N  | 0.455482 | -0.20803 | 0.147833 |
| H  | 0.378152 | 0.857668 | -0.05903 |
| C  | -0.81399 | -0.91377 | 0.303384 |
| H  | -1.23323 | -1.22639 | -0.65682 |
| H  | -0.65408 | -1.81797 | 0.90425  |
| C  | -1.82093 | 0.025272 | 0.990157 |
| H  | -1.45323 | 0.331798 | 1.974207 |
| H  | -1.93723 | 0.937447 | 0.396346 |
| N  | -3.14092 | -0.61464 | 1.165089 |
| H  | -3.08464 | -1.41541 | 1.797109 |
| H  | -4.27399 | -0.0139  | 1.135483 |
| Br | 0.052592 | 2.770312 | -0.50289 |
| C  | -3.95974 | -1.00848 | -0.12342 |
| O  | -5.01243 | -0.31755 | 0.129016 |
| O  | -3.57393 | -1.7491  | -0.99017 |

---



---

**ts7-1**

---

|   |          |          |          |
|---|----------|----------|----------|
| C | -2.24399 | -0.04482 | -0.77739 |
| H | -1.99095 | 0.400923 | -1.74167 |
| H | -2.11316 | -1.12974 | -0.85462 |
| C | -1.31598 | 0.525653 | 0.300202 |
| H | -1.47625 | 1.603012 | 0.414179 |
| H | -1.51141 | 0.03652  | 1.259381 |
| N | 0.082546 | 0.264172 | -0.06023 |
| H | 0.686171 | 0.348209 | 0.778687 |
| C | 0.662626 | 1.117222 | -1.15849 |
| O | 1.805919 | 0.700759 | -1.52638 |
| O | -0.01422 | 2.054167 | -1.58155 |
| C | 3.66224  | -2.26307 | -0.16353 |
| H | 4.225902 | -2.9373  | 0.494876 |
| H | 3.991995 | -2.45334 | -1.18662 |
| C | 2.172119 | -2.58123 | 0.012305 |
| H | 1.875026 | -2.31891 | 1.033068 |
| H | 2.013003 | -3.65177 | -0.13525 |

|    |          |          |          |
|----|----------|----------|----------|
| N  | 1.306049 | -1.82024 | -0.92914 |
| H  | 0.884999 | -2.40266 | -1.64879 |
| H  | 0.521308 | -1.07868 | -0.42954 |
| H  | 1.784619 | -0.97943 | -1.35833 |
| C  | -4.3333  | 1.191113 | -0.13528 |
| N  | -3.98672 | 2.429766 | -0.5898  |
| N  | -5.41992 | 1.083796 | 0.679718 |
| C  | -4.07878 | 3.61417  | 0.259147 |
| H  | -3.09324 | 4.088968 | 0.328977 |
| H  | -4.7857  | 4.348068 | -0.14705 |
| H  | -4.39926 | 3.330502 | 1.261226 |
| C  | -3.31344 | 2.620359 | -1.878   |
| H  | -3.67523 | 3.558397 | -2.31159 |
| H  | -2.22226 | 2.66236  | -1.77975 |
| H  | -3.58714 | 1.808831 | -2.55365 |
| C  | -6.63278 | 1.862353 | 0.439771 |
| H  | -7.4633  | 1.184331 | 0.211468 |
| H  | -6.90383 | 2.456224 | 1.320368 |
| H  | -6.49039 | 2.529867 | -0.40934 |
| C  | -5.57969 | -0.07659 | 1.56708  |
| H  | -6.22607 | 0.222821 | 2.397047 |
| H  | -5.99692 | -0.9463  | 1.047294 |
| H  | -4.607   | -0.37449 | 1.95942  |
| N  | -3.66325 | 0.095652 | -0.45553 |
| H  | -4.14287 | -0.86413 | -0.40308 |
| Br | -4.50438 | -2.86047 | -0.44968 |
| C  | 4.851114 | -0.05189 | -0.29171 |
| N  | 5.330111 | -0.17159 | -1.56507 |
| N  | 5.354039 | 0.932259 | 0.49044  |
| C  | 6.73999  | 0.069399 | -1.86231 |
| H  | 7.122556 | -0.75703 | -2.47163 |
| H  | 6.890229 | 1.001998 | -2.42    |
| H  | 7.315586 | 0.113086 | -0.93776 |
| C  | 4.47118  | -0.44186 | -2.72095 |
| H  | 4.82043  | 0.180056 | -3.55159 |
| H  | 4.526196 | -1.48912 | -3.04583 |
| H  | 3.445244 | -0.14379 | -2.50102 |
| C  | 5.61782  | 2.266143 | -0.05363 |
| H  | 5.033423 | 2.999266 | 0.511145 |
| H  | 6.679197 | 2.52641  | 0.02676  |
| H  | 5.306657 | 2.316274 | -1.09588 |
| C  | 5.344809 | 0.844074 | 1.956914 |

|              |          |          |          |
|--------------|----------|----------|----------|
| H            | 6.191941 | 1.425027 | 2.332346 |
| H            | 4.405533 | 1.211431 | 2.382461 |
| H            | 5.461486 | -0.19581 | 2.263563 |
| N            | 3.93939  | -0.87643 | 0.217725 |
| H            | 3.377024 | -0.53583 | 1.044804 |
| Br           | 2.020191 | -0.15671 | 2.65819  |
| <hr/>        |          |          |          |
| <b>ts7-2</b> |          |          |          |
| C            | -0.8804  | 1.573    | 1.505014 |
| H            | -0.52557 | 0.583967 | 1.820744 |
| H            | -1.6846  | 1.880809 | 2.183011 |
| C            | 0.230186 | 2.634947 | 1.597981 |
| H            | -0.15274 | 3.586481 | 1.213941 |
| H            | 0.468685 | 2.777823 | 2.655604 |
| N            | 1.460008 | 2.311448 | 0.899051 |
| H            | 2.237001 | 1.922151 | 1.412842 |
| C            | 1.586055 | 2.430902 | -0.47151 |
| O            | 2.709359 | 2.010193 | -0.99124 |
| O            | 0.650859 | 2.900529 | -1.14396 |
| C            | -2.11947 | 0.466859 | -0.35273 |
| N            | -3.11189 | -0.06301 | 0.411831 |
| N            | -1.9443  | 0.039165 | -1.61836 |
| C            | -3.37117 | -1.50534 | 0.45199  |
| H            | -3.41164 | -1.81754 | 1.49995  |
| H            | -4.32308 | -1.76153 | -0.02798 |
| H            | -2.53984 | -2.04137 | -0.00575 |
| C            | -3.86603 | 0.748068 | 1.360514 |
| H            | -4.92858 | 0.497238 | 1.270705 |
| H            | -3.55972 | 0.562838 | 2.397411 |
| H            | -3.74096 | 1.806114 | 1.129266 |
| C            | -3.02873 | -0.57312 | -2.38245 |
| H            | -3.01489 | -0.16386 | -3.39653 |
| H            | -2.92173 | -1.66185 | -2.44403 |
| H            | -3.98874 | -0.33329 | -1.92644 |
| C            | -0.60504 | 0.028465 | -2.24246 |
| H            | 0.030017 | -0.66015 | -1.67535 |
| H            | -0.71738 | -0.34326 | -3.26113 |
| H            | -0.15937 | 1.024748 | -2.28399 |
| N            | -1.36936 | 1.476943 | 0.117688 |
| H            | -0.81129 | 2.029394 | -0.55099 |
| Br           | 0.132808 | -2.22103 | 0.587273 |
| C            | 2.247105 | -0.81081 | 0.759165 |

|   |          |          |          |
|---|----------|----------|----------|
| C | 3.154766 | -0.9567  | -0.37745 |
| O | 3.74773  | 0.165323 | 0.271598 |
| H | 1.521786 | -0.02428 | 0.745071 |
| H | 2.52612  | -1.245   | 1.708744 |
| H | 2.708889 | -0.70733 | -1.34804 |
| C | 4.028915 | -2.18876 | -0.45335 |
| H | 3.426955 | -3.05434 | -0.74706 |
| H | 4.828646 | -2.04552 | -1.18615 |
| H | 4.485964 | -2.39004 | 0.520135 |
| H | 3.235829 | 1.268529 | -0.38948 |

---

| <b>ts7-3</b> |          |          |          |
|--------------|----------|----------|----------|
| C            | 2.811553 | -1.45416 | 1.375552 |
| H            | 2.394823 | -0.59639 | 1.911998 |
| H            | 3.692562 | -1.81388 | 1.921272 |
| C            | 1.776966 | -2.59188 | 1.304707 |
| H            | 2.216328 | -3.45408 | 0.795687 |
| H            | 1.543867 | -2.89388 | 2.331041 |
| N            | 0.555631 | -2.23935 | 0.620249 |
| H            | -0.10816 | -1.62212 | 1.084122 |
| C            | 0.545162 | -2.16529 | -0.76282 |
| O            | -0.47472 | -1.54642 | -1.28951 |
| O            | 1.490248 | -2.64119 | -1.42701 |
| C            | 3.536754 | 0.233652 | -0.29371 |
| N            | 4.205704 | 1.004073 | 0.61116  |
| N            | 3.262476 | 0.752325 | -1.50824 |
| C            | 3.872785 | 2.418129 | 0.789576 |
| H            | 3.756537 | 2.617883 | 1.859624 |
| H            | 4.653391 | 3.080875 | 0.397018 |
| H            | 2.9209   | 2.632689 | 0.305127 |
| C            | 5.192152 | 0.445472 | 1.530002 |
| H            | 6.066113 | 1.105539 | 1.554882 |
| H            | 4.803101 | 0.352096 | 2.550803 |
| H            | 5.51408  | -0.53488 | 1.178623 |
| C            | 4.167541 | 1.701278 | -2.15558 |
| H            | 4.394682 | 1.341657 | -3.16417 |
| H            | 3.715374 | 2.695982 | -2.23657 |
| H            | 5.100369 | 1.776799 | -1.59795 |
| C            | 2.125728 | 0.288637 | -2.32071 |
| H            | 1.246938 | 0.148206 | -1.69486 |
| H            | 1.9088   | 1.067864 | -3.0538  |
| H            | 2.338405 | -0.64941 | -2.8408  |

|    |          |          |          |
|----|----------|----------|----------|
| N  | 3.182797 | -1.01598 | 0.015326 |
| H  | 2.797331 | -1.62539 | -0.72971 |
| Br | -5.49132 | 0.334236 | -0.44983 |
| C  | -3.52109 | 0.598251 | -0.37051 |
| C  | -2.85385 | -0.33422 | 0.647434 |
| O  | -1.44888 | -0.22078 | 0.488239 |
| H  | -3.16858 | 0.384418 | -1.37874 |
| H  | -3.3712  | 1.64763  | -0.12603 |
| H  | -3.14607 | -1.36434 | 0.387266 |
| C  | -3.26947 | -0.05889 | 2.091924 |
| H  | -4.35076 | -0.16588 | 2.21303  |
| H  | -2.77118 | -0.76857 | 2.759668 |
| H  | -2.98149 | 0.95397  | 2.385893 |
| H  | -0.99997 | -0.91123 | -0.50239 |
| C  | -0.44229 | 1.481908 | 0.79266  |
| O  | -1.25315 | 2.31133  | 1.037875 |
| O  | 0.678025 | 1.09846  | 0.62695  |

---



---

**ts7-4**

---

|   |          |          |          |
|---|----------|----------|----------|
| C | 2.791365 | 1.096324 | -1.6074  |
| H | 2.105694 | 0.304511 | -1.91957 |
| H | 3.587661 | 1.192644 | -2.35524 |
| C | 2.043589 | 2.435089 | -1.52735 |
| H | 2.719532 | 3.230444 | -1.20479 |
| H | 1.693965 | 2.684646 | -2.53375 |
| N | 0.908733 | 2.426329 | -0.6239  |
| H | 0.112288 | 1.855768 | -0.88715 |
| C | 1.135734 | 2.568998 | 0.72112  |
| O | 0.103216 | 2.267171 | 1.52243  |
| O | 2.209523 | 2.948704 | 1.183692 |
| C | 3.43836  | -0.55819 | 0.118503 |
| N | 3.682105 | -1.55124 | -0.7764  |
| N | 3.324171 | -0.86207 | 1.423802 |
| C | 2.938517 | -2.815   | -0.70814 |
| H | 2.621097 | -3.07834 | -1.72141 |
| H | 3.547847 | -3.63542 | -0.31219 |
| H | 2.038854 | -2.66873 | -0.11087 |
| C | 4.559083 | -1.36356 | -1.9286  |
| H | 5.209267 | -2.23964 | -2.02284 |
| H | 3.997647 | -1.25136 | -2.86354 |
| H | 5.188144 | -0.48553 | -1.77981 |
| C | 4.024589 | -2.00475 | 2.009822 |

|    |          |          |          |
|----|----------|----------|----------|
| H  | 4.508848 | -1.68137 | 2.935825 |
| H  | 3.334562 | -2.82264 | 2.243871 |
| H  | 4.791411 | -2.36719 | 1.326126 |
| C  | 2.518968 | -0.04588 | 2.345244 |
| H  | 1.581764 | 0.224354 | 1.863908 |
| H  | 2.293512 | -0.65875 | 3.219253 |
| H  | 3.042704 | 0.857314 | 2.672102 |
| N  | 3.352343 | 0.715291 | -0.29801 |
| H  | 3.32097  | 1.450627 | 0.410705 |
| H  | -0.58068 | 1.759703 | 1.03311  |
| Br | -5.63028 | -0.46191 | 0.291039 |
| C  | -3.16797 | -1.09773 | -0.04482 |
| C  | -2.80153 | 0.344871 | -0.35413 |
| O  | -1.35321 | 0.497248 | -0.10479 |
| H  | -3.24149 | -1.42531 | 0.979382 |
| H  | -3.5943  | -1.73516 | -0.79934 |
| H  | -3.2888  | 1.005058 | 0.360261 |
| C  | -3.10704 | 0.756393 | -1.78484 |
| H  | -4.18696 | 0.691183 | -1.93234 |
| H  | -2.77929 | 1.783543 | -1.97007 |
| H  | -2.60445 | 0.089619 | -2.49385 |
| C  | -0.67351 | -0.72145 | -0.18651 |
| O  | -1.44676 | -1.72389 | -0.30691 |
| O  | 0.558171 | -0.687   | -0.13442 |

---



---

**ts8-2**

---

|   |          |          |          |
|---|----------|----------|----------|
| C | 2.326887 | 1.691201 | -1.40417 |
| H | 1.941548 | 0.788608 | -1.88843 |
| H | 2.934119 | 2.245231 | -2.13055 |
| C | 1.162757 | 2.589127 | -0.94863 |
| H | 1.560735 | 3.496057 | -0.48521 |
| H | 0.604186 | 2.889032 | -1.84124 |
| N | 0.263039 | 1.96003  | -0.01047 |
| H | -0.3894  | 1.256243 | -0.34956 |
| C | 0.654451 | 1.799398 | 1.308795 |
| O | -0.04043 | 0.945658 | 2.006051 |
| O | 1.641503 | 2.424018 | 1.752931 |
| C | 3.813206 | 0.131415 | -0.16898 |
| N | 4.347347 | -0.42959 | -1.29161 |
| N | 3.994644 | -0.49063 | 1.014335 |
| C | 4.278583 | -1.87329 | -1.51921 |
| H | 3.904122 | -2.05122 | -2.53255 |

|   |          |          |          |
|---|----------|----------|----------|
| H | 5.258904 | -2.35545 | -1.42384 |
| H | 3.573891 | -2.31955 | -0.81861 |
| C | 4.908678 | 0.375022 | -2.37159 |
| H | 5.860536 | -0.0676  | -2.68509 |
| H | 4.246574 | 0.418984 | -3.24444 |
| H | 5.1025   | 1.387617 | -2.01784 |
| C | 5.22235  | -1.22981 | 1.307507 |
| H | 5.637704 | -0.86482 | 2.25226  |
| H | 5.030273 | -2.30395 | 1.406335 |
| H | 5.959545 | -1.06898 | 0.521681 |
| C | 3.056586 | -0.33147 | 2.137607 |
| H | 2.029859 | -0.34568 | 1.778021 |
| H | 3.201249 | -1.18226 | 2.806429 |
| H | 3.221465 | 0.597303 | 2.690663 |
| N | 3.143025 | 1.283427 | -0.243   |
| H | 2.867939 | 1.759158 | 0.637076 |
| H | -0.6337  | 0.258839 | 1.311761 |
| C | -2.5744  | -0.66703 | 0.727274 |
| C | -3.29709 | -1.01317 | -0.57065 |
| O | -1.21297 | -0.44703 | 0.408227 |
| H | -3.00827 | 0.27851  | 1.090701 |
| H | -3.16069 | -0.23158 | -1.32019 |
| H | -2.99142 | -1.98302 | -0.96491 |
| C | -2.77054 | -1.73196 | 1.808325 |
| H | -2.27661 | -1.41783 | 2.732747 |
| H | -3.83506 | -1.87505 | 2.018914 |
| H | -2.3423  | -2.68683 | 1.491208 |
| F | -4.70438 | -1.10775 | -0.32373 |
| C | -0.00549 | -1.89947 | -0.33998 |
| O | 1.033096 | -1.31242 | -0.36047 |
| O | -0.7091  | -2.83374 | -0.52781 |
| B | -5.90325 | 0.603244 | -0.56297 |
| F | -5.49714 | 1.205785 | 0.549138 |
| F | -7.04058 | -0.07548 | -0.56295 |
| F | -5.35462 | 0.960507 | -1.72186 |

---



---

**ts9-2**

---

|   |          |          |          |
|---|----------|----------|----------|
| C | -3.13234 | -0.07162 | 2.16542  |
| H | -2.49673 | -0.88994 | 1.81252  |
| H | -3.66393 | -0.40649 | 3.064487 |
| C | -2.27195 | 1.152232 | 2.528421 |
| H | -2.91614 | 1.953161 | 2.902031 |

|   |          |          |          |
|---|----------|----------|----------|
| H | -1.60119 | 0.85793  | 3.34205  |
| N | -1.49184 | 1.6723   | 1.43057  |
| H | -0.65538 | 1.173143 | 1.132949 |
| C | -2.11253 | 2.409381 | 0.436364 |
| O | -1.43021 | 2.567525 | -0.66304 |
| O | -3.27119 | 2.846472 | 0.606307 |
| C | -4.54598 | -0.59332 | 0.190521 |
| N | -4.72714 | -1.90351 | 0.523889 |
| N | -4.85975 | -0.19352 | -1.05933 |
| C | -4.36313 | -2.97647 | -0.4023  |
| H | -3.75416 | -3.71167 | 0.133814 |
| H | -5.24314 | -3.48824 | -0.80995 |
| H | -3.76043 | -2.56957 | -1.21335 |
| C | -5.18265 | -2.31348 | 1.848402 |
| H | -5.95459 | -3.08247 | 1.734706 |
| H | -4.37095 | -2.72966 | 2.456767 |
| H | -5.62192 | -1.46341 | 2.370468 |
| C | -5.97053 | -0.79498 | -1.79699 |
| H | -6.63673 | 0.000857 | -2.14486 |
| H | -5.61593 | -1.35531 | -2.66907 |
| H | -6.53855 | -1.46218 | -1.14982 |
| C | -4.22632 | 0.974995 | -1.692   |
| H | -3.16032 | 0.991553 | -1.47521 |
| H | -4.35952 | 0.874371 | -2.77092 |
| H | -4.66465 | 1.91946  | -1.3582  |
| N | -4.08552 | 0.275817 | 1.092771 |
| H | -4.08781 | 1.28798  | 0.861345 |
| H | -0.56186 | 1.825723 | -0.70045 |
| C | 1.609504 | 1.200536 | -1.00029 |
| C | 2.522104 | 0.351166 | -0.1253  |
| O | 0.30116  | 0.87663  | -0.59225 |
| H | 2.430848 | 0.615107 | 0.929702 |
| H | 2.35575  | -0.7139  | -0.27868 |
| C | -0.51275 | -0.89458 | -1.41106 |
| O | -1.55873 | -0.91498 | -0.84459 |
| O | 0.346561 | -1.254   | -2.13545 |
| P | 5.552433 | -0.67949 | 0.277186 |
| F | 4.660817 | -1.80976 | -0.41744 |
| F | 6.140853 | -0.31004 | -1.15494 |
| F | 3.900451 | 0.600358 | -0.4871  |
| F | 4.586324 | -0.77342 | 1.552205 |
| F | 6.056151 | 0.732026 | 0.816977 |



|   |          |          |          |
|---|----------|----------|----------|
| F | 6.721867 | -1.58346 | 0.803594 |
| H | 1.772594 | 0.89534  | -2.04659 |
| C | 1.90826  | 2.694305 | -0.86033 |
| H | 2.942695 | 2.910407 | -1.14319 |
| H | 1.241725 | 3.278104 | -1.50062 |
| H | 1.754431 | 3.020885 | 0.174218 |

---

| <b>ts10-2</b> |          |          |          |
|---------------|----------|----------|----------|
| C             | 3.229335 | 1.272556 | -1.53045 |
| H             | 2.829422 | 0.366306 | -1.99529 |
| H             | 4.122923 | 1.584558 | -2.08527 |
| C             | 2.190514 | 2.406604 | -1.59409 |
| H             | 2.610525 | 3.312372 | -1.1486  |
| H             | 1.991726 | 2.616059 | -2.6504  |
| N             | 0.94583  | 2.112859 | -0.9221  |
| H             | 0.310815 | 1.449848 | -1.35593 |
| C             | 0.893708 | 2.148162 | 0.466983 |
| O             | -0.13526 | 1.573503 | 1.010404 |
| O             | 1.823569 | 2.685228 | 1.108604 |
| C             | 3.918037 | -0.251   | 0.301529 |
| N             | 4.616265 | -1.09404 | -0.51248 |
| N             | 3.613342 | -0.66182 | 1.549134 |
| C             | 4.284304 | -2.51789 | -0.58298 |
| H             | 4.199389 | -2.80572 | -1.63588 |
| H             | 5.050591 | -3.14673 | -0.11396 |
| H             | 3.317198 | -2.69021 | -0.11182 |
| C             | 5.627745 | -0.61184 | -1.44683 |
| H             | 6.503642 | -1.26737 | -1.38969 |
| H             | 5.26931  | -0.60787 | -2.48311 |
| H             | 5.936835 | 0.396629 | -1.17143 |
| C             | 4.500864 | -1.55022 | 2.298419 |
| H             | 4.692299 | -1.11059 | 3.282336 |
| H             | 4.051495 | -2.53909 | 2.442812 |
| H             | 5.452127 | -1.66217 | 1.779191 |
| C             | 2.450977 | -0.13869 | 2.285535 |
| H             | 1.592229 | -0.05655 | 1.622616 |
| H             | 2.214184 | -0.85602 | 3.073717 |
| H             | 2.646112 | 0.840039 | 2.732288 |
| N             | 3.567283 | 0.963855 | -0.12706 |
| H             | 3.152351 | 1.633736 | 0.548268 |
| C             | -3.43335 | 1.839162 | 1.175376 |
| C             | -4.01135 | 1.961795 | -0.24025 |
| C             | -3.10502 | 1.283306 | -1.28671 |
| C             | -2.48654 | -0.0706  | -0.8318  |

|    |          |          |          |
|----|----------|----------|----------|
| C  | -3.14154 | -0.62565 | 0.441561 |
| C  | -3.21361 | 0.365611 | 1.607628 |
| H  | -3.66932 | 1.132015 | -2.21292 |
| H  | -5.00764 | 1.510643 | -0.27074 |
| H  | -4.13507 | 3.019468 | -0.50127 |
| H  | -2.47236 | 2.362247 | 1.213065 |
| H  | -4.09162 | 2.338702 | 1.894443 |
| H  | -2.60588 | -0.82038 | -1.61887 |
| H  | -3.99176 | 0.032375 | 2.299282 |
| H  | -2.26294 | 0.292665 | 2.149252 |
| H  | -2.2677  | 1.944875 | -1.53406 |
| O  | -1.08589 | 0.051333 | -0.59884 |
| H  | -2.64783 | -1.55284 | 0.726549 |
| Br | -4.98845 | -1.28687 | -0.04836 |
| H  | -0.68705 | 0.826529 | 0.247729 |
| C  | -0.01894 | -1.57451 | -0.81551 |
| O  | 1.087095 | -1.19604 | -0.54976 |
| O  | -0.79179 | -2.41026 | -1.15074 |

---



---

**PC**

---

|   |          |          |          |
|---|----------|----------|----------|
| C | -1.03915 | -0.07111 | 0.42625  |
| C | -0.50406 | 1.286188 | -0.05464 |
| O | 0.070136 | -0.94926 | 0.135865 |
| H | -1.17752 | -0.06827 | 1.514921 |
| H | -0.77261 | 2.118283 | 0.598791 |
| H | -0.81852 | 1.511322 | -1.08099 |
| C | -2.29253 | -0.56262 | -0.26992 |
| H | -2.56151 | -1.56194 | 0.080618 |
| H | -3.12935 | 0.110924 | -0.05734 |
| H | -2.1407  | -0.6026  | -1.35244 |
| C | 1.208859 | -0.21942 | -0.0197  |
| O | 0.918281 | 1.113171 | -0.02682 |
| O | 2.306763 | -0.67716 | -0.13348 |

---

(a) route 1

cp1-1

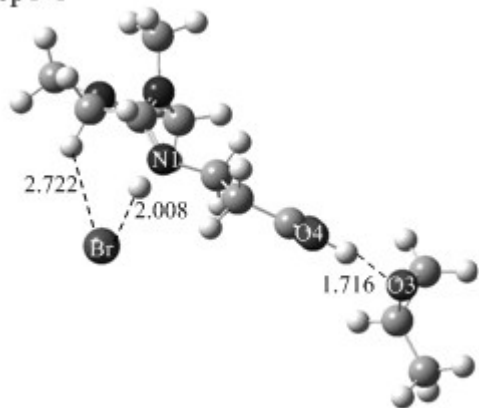

ts1-1

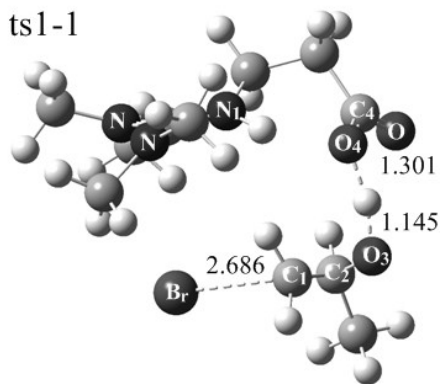

cp1-2

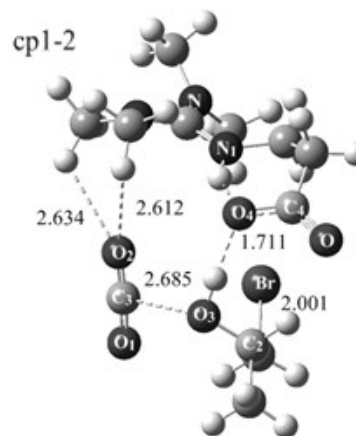

ts1-2

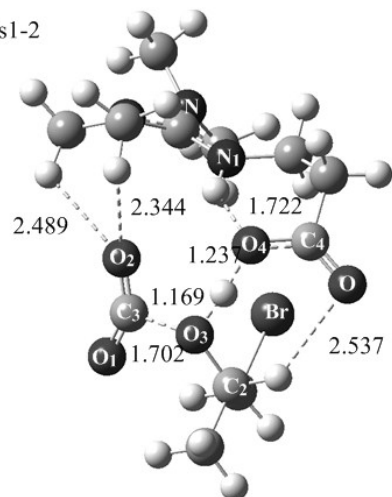

cp1-3

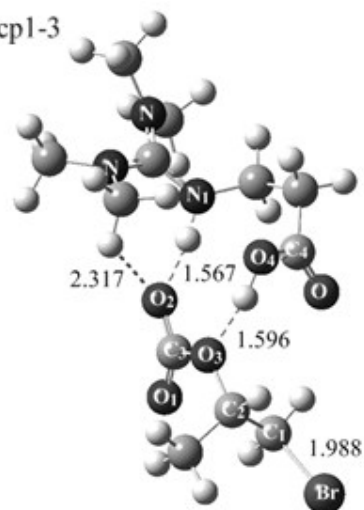

ts1-3

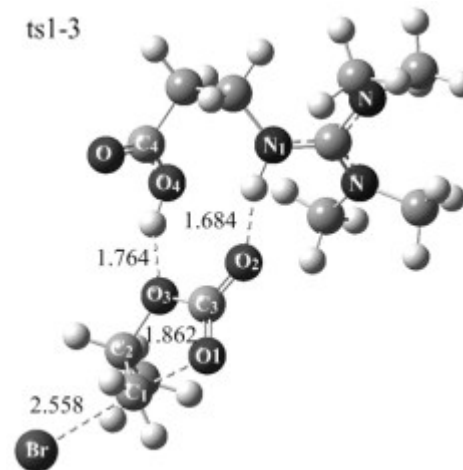

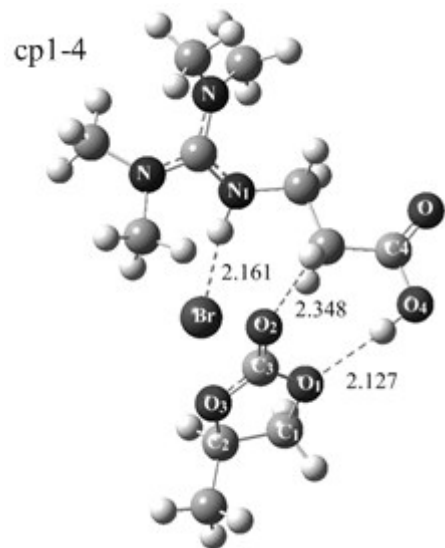

(b) route 2

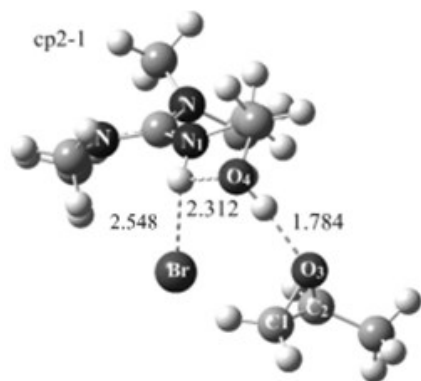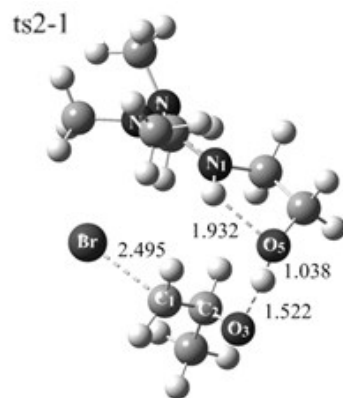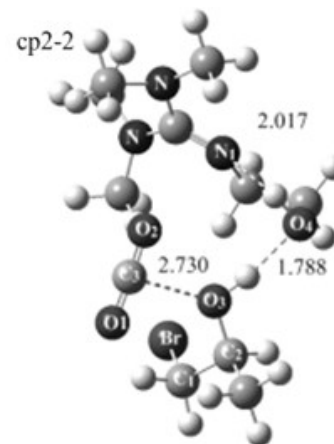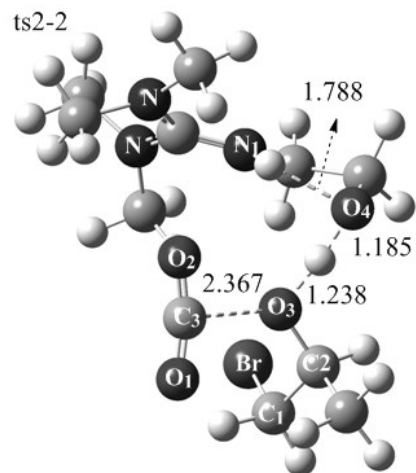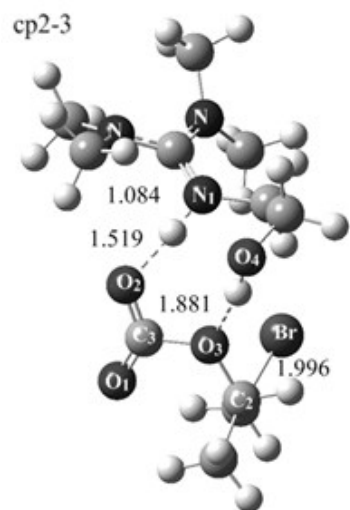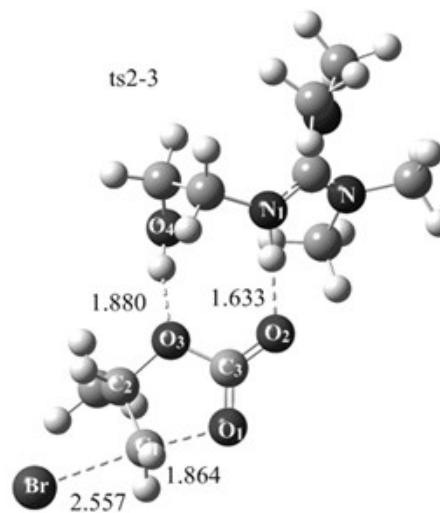

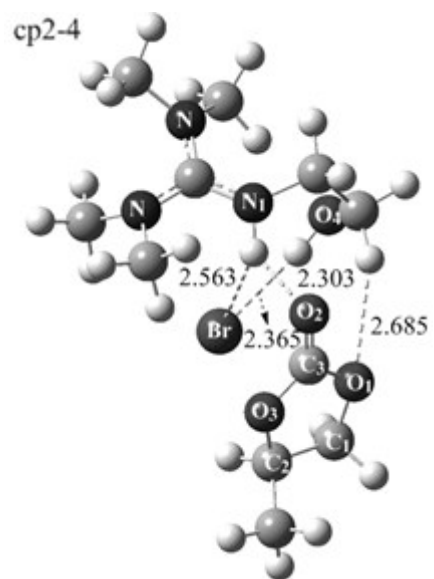

(c) route3

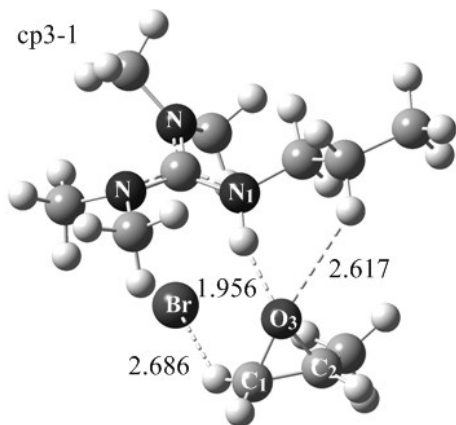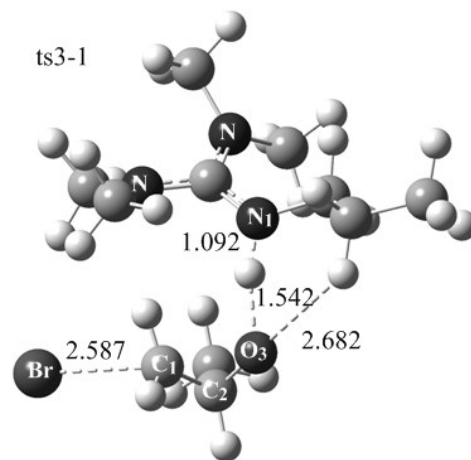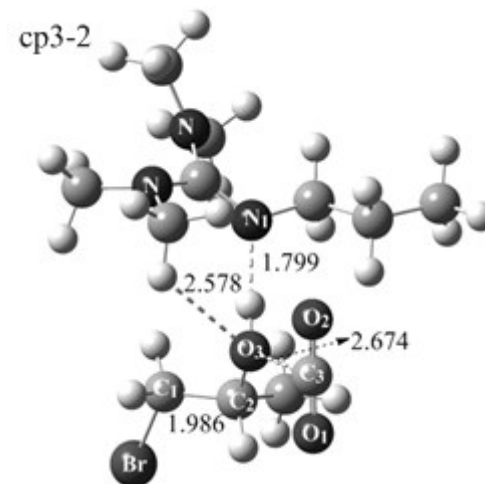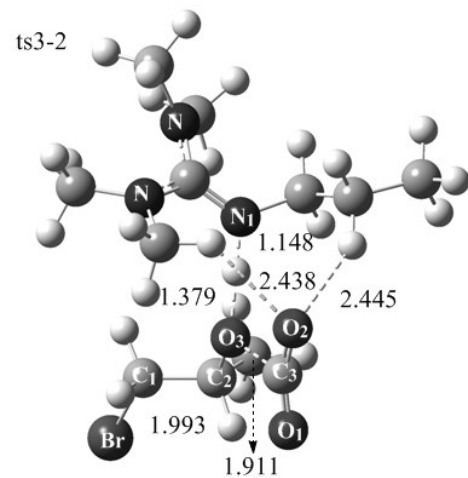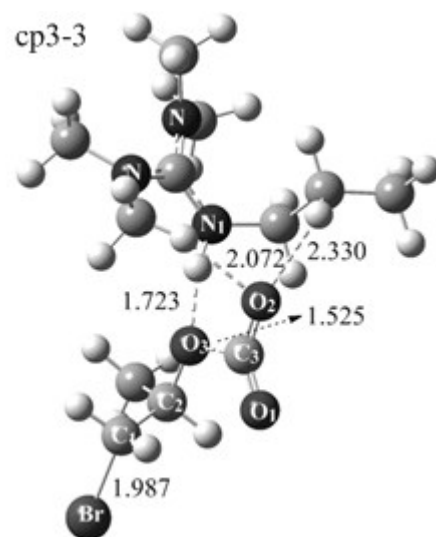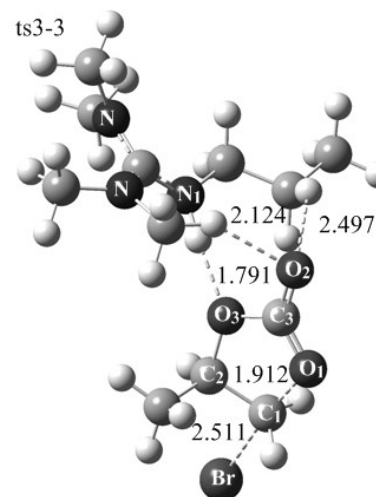

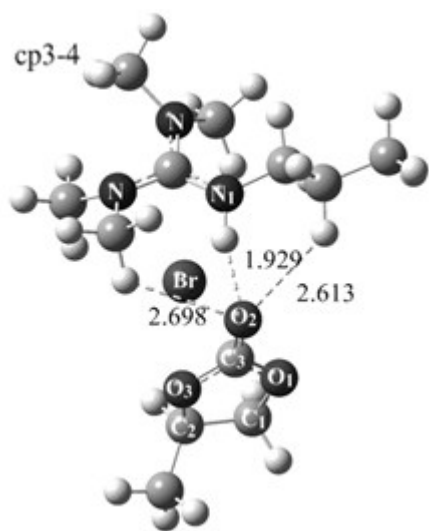



(d) route 4

cp4-1

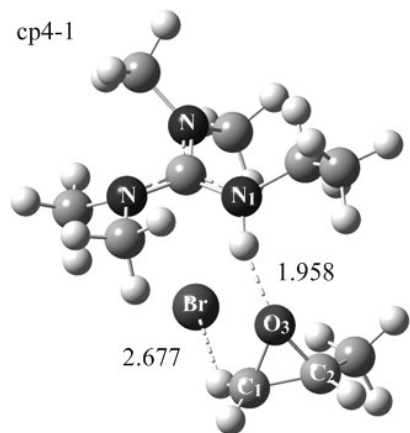

ts4-1

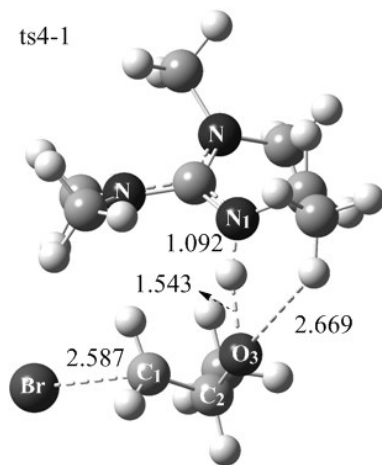

cp4-2

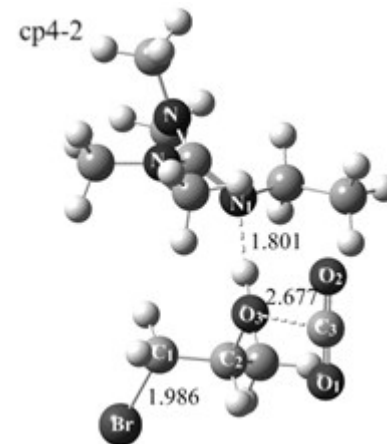

ts4-2

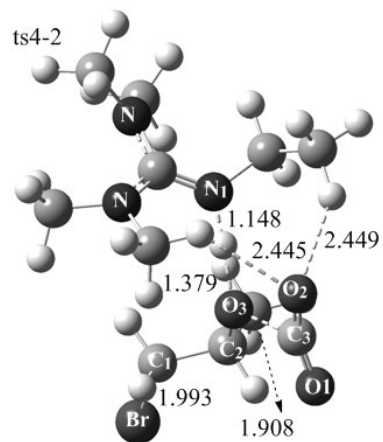

cp4-3

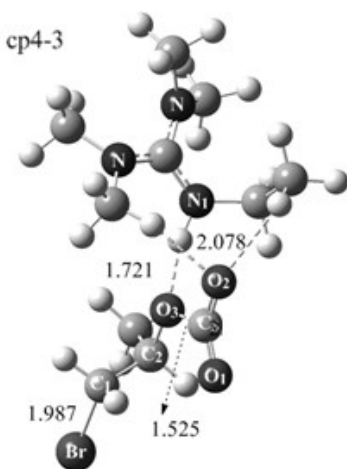

ts4-3

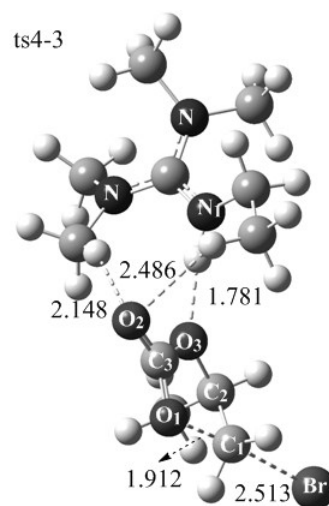

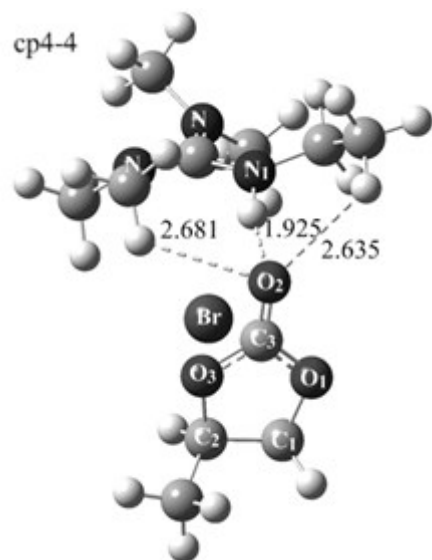

Figure S1 Optimized geometries for the intermediates and transition states involved in routes 1-4. Distances are in angstroms.

cp5-1

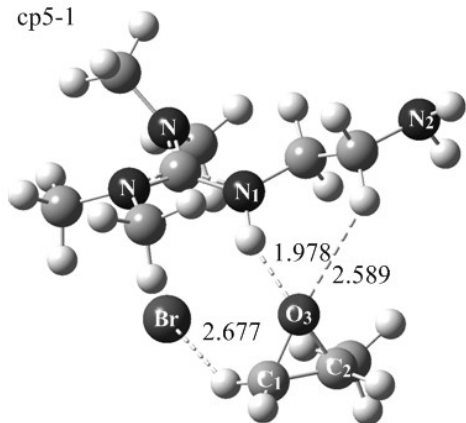

ts5-1

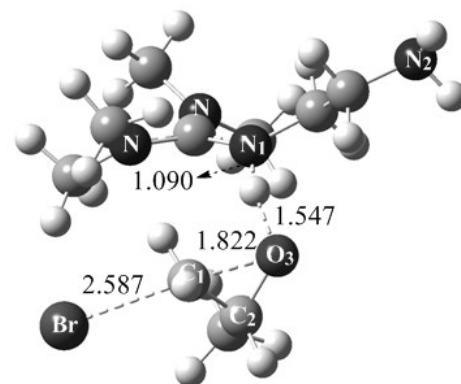

cp5-2

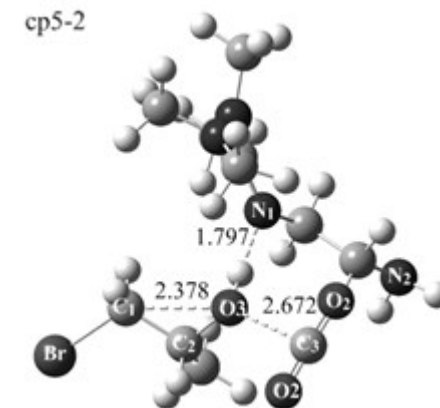

ts5-2

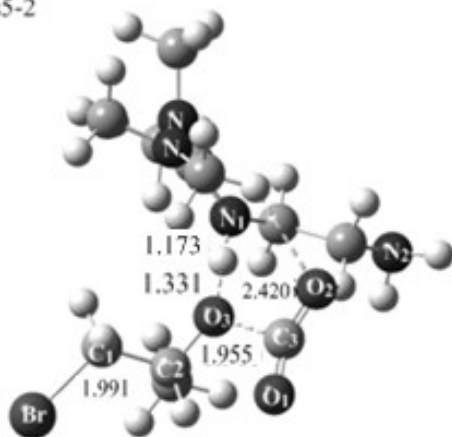

cp5-3

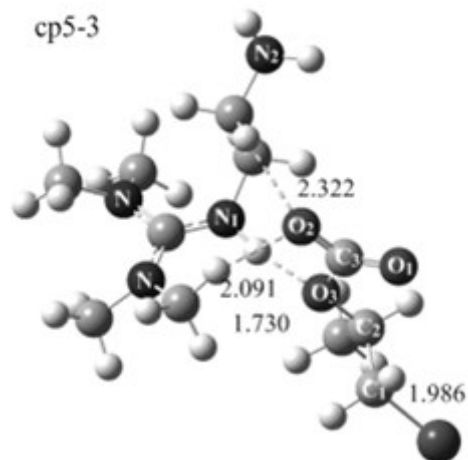

ts5-3

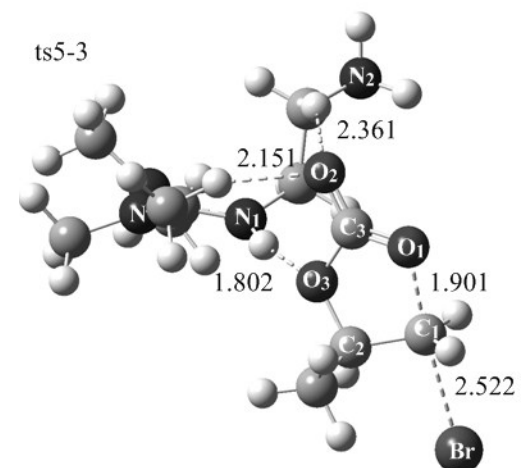

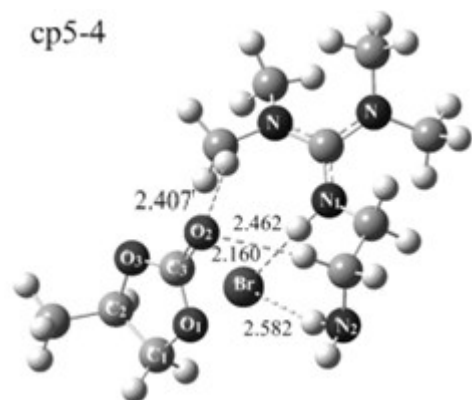

Figure. S2 Optimized geometries for the intermediates and transition states involved in route 5. Distances are in angstroms.

(a) route 7

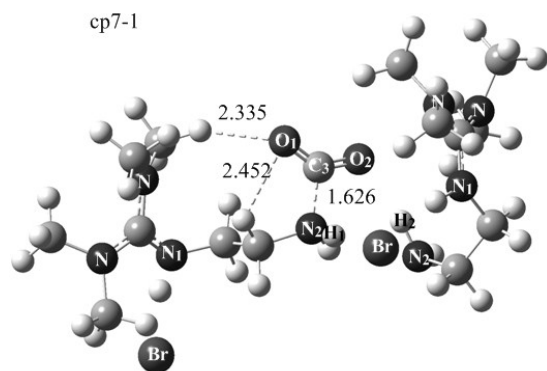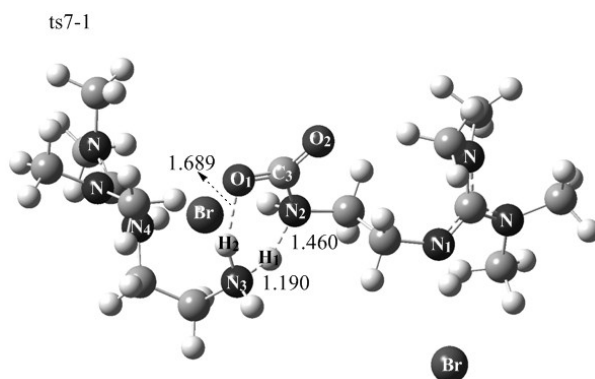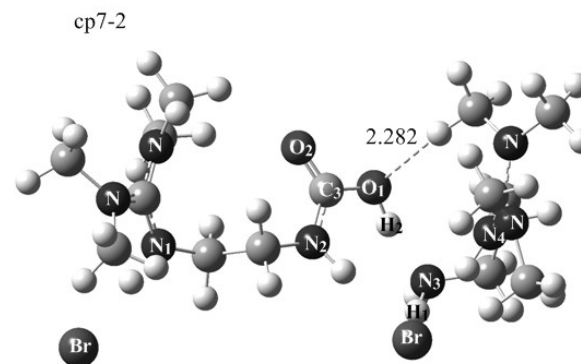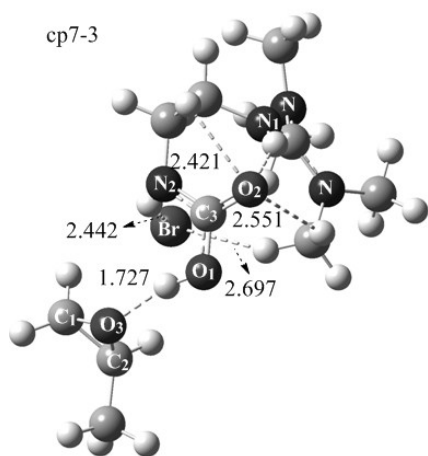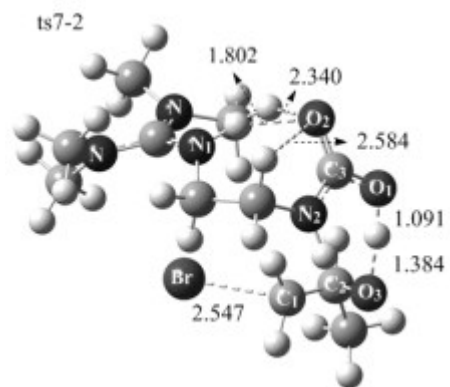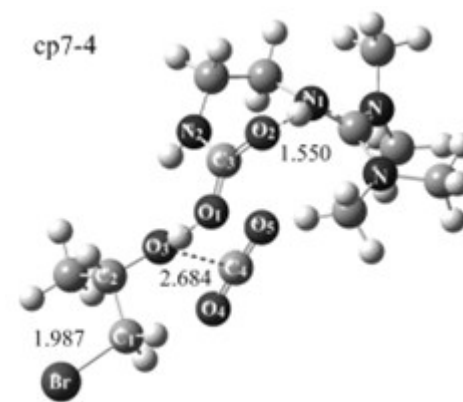

ts7-3

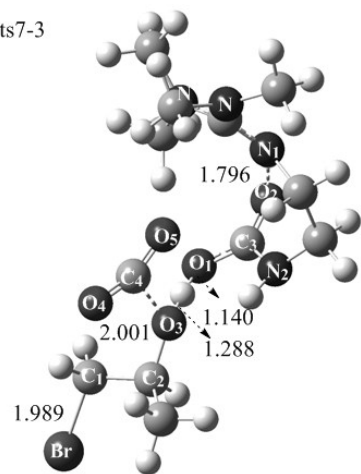

cp7-5

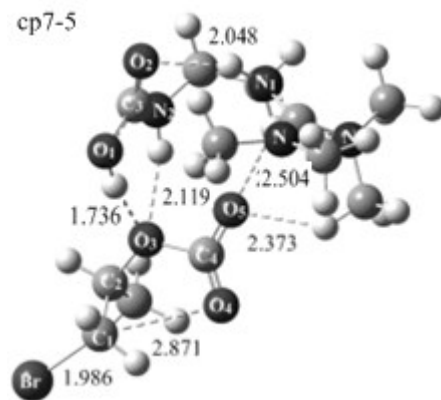

ts7-4

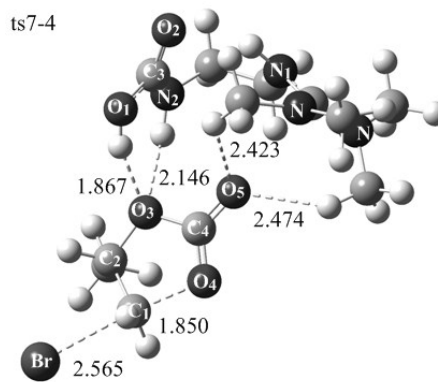

cp7-6

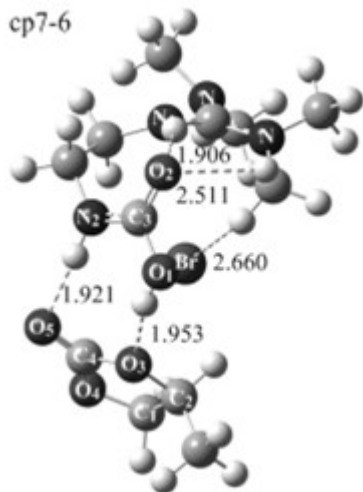

(b) route 8

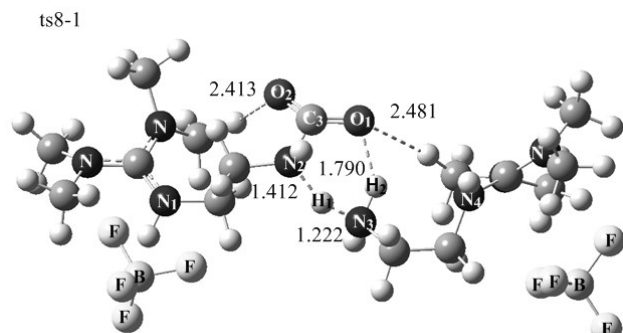

(c) route 9

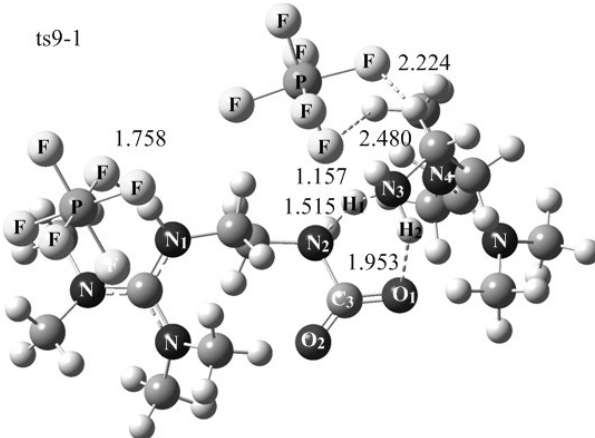

(d) route 10

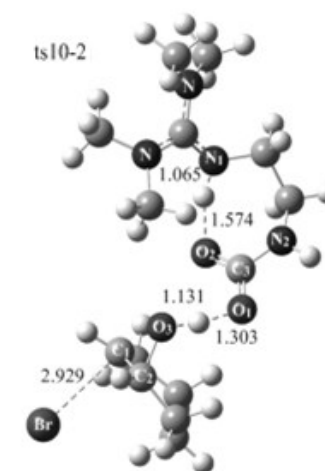

Figure S3 Optimized geometries for the intermediates and transition states involved in routes 6-10. Distances are in angstroms.
